# Supplementary material for: Identification and Characterization of Novel Genotoxic Stress-Inducible Nuclear Long Noncoding RNAs in Mammalian Cells
Source: PLoS One. 2012 Apr 19;7(4):e34949. doi: 10.1371/journal.pone.0034949 (PMC3330809; doi:10.1371/journal.pone.0034949)
Supplement: Table S1 — Oligonucleotides used for qRT-PCR. All the primers sequences used in the text were listed in the table. (XLS) [file pone.0034949.s005.xls]

## Sheet: Table S1
Table S1. Oligonucleotides used for qRT-PCR
Name		Forward sequence (5'-3')	Reverse sequence (5'-3')
MALAT1		GCTGTGGAGTTCTTAAATATCAACC	TTCTCAATCCTGAAATCCCCTA
GAPDH		GCACCGTCAAGGCTGAGAAC	TGGTGAAGACGCCAGTGGA
UPF1		AGATCACGGCACAGCAGAT	TGGCAGAAGGGTTTTCCTT
UHG		AAAGCCCAAGAGGAGTTTGAG	ACACCTTATTTGCTCAGACCTGT
GAS5		TCCTGTGAGGTATGGTGCTG	CATCCTTCCTTGGGGACAC
beta-actin		CCAACCGCGAGAAGATGA	CCAGAGGCGTACAGGGATAG
Gadd45a		TTTGCAATATGACTTTGGAGGA	CATCCCCCACCTTATCCAT
p21		CGAAGTCAGTTCCTTGTGGAG	CATGGGTTCTGACGGACAT
UT1	AK127256	TCTGGAGAGGGAGGCATCTA	ACTCATCCCCACCCACACT
UT2	BX537518.1	GGCCAGGTGCAATATCCTC	CAGATAAAATCCGCCCTGAG
UT3	BX648321.1	AGCCTGGGAATATGGAGACC	GCCCAGGTAGGACCCTGT
UT4	BX648343.1	TGCACATACACAGGTTAGAACAAG	GAACCTAAACTTGGGTCTCTGG
UT5	AL713664.1	GGAAAAATGAGGAAGCTGTGA	GGCTTCTGAGATGGTTCCAG
UT6	AL833456.1	TGAAGCTGAGGTTAAGAAACCA	TCACCATCTCTCAACTCTGCAC
UT7	BX641108.1	GGATGTTGGGATACAGAGATTTTT	CAGATTGAAACTCAGAGCAAAGC
UT8	BX641108.1	ACCCAAATGGTAGAGGAGGTC	ACTTCATTTTCTCATCTACTGCTTACA
UT9	NR_015389	CTGGAATGCAAATGTGATGG	CCTGGGGAGTGACTCTCATC
UT10	AL117555.1	TAATCACAAAATGACGTGCCTTA	TGTCTGGACACTGCCAACC
UT11	AK055564	GCATTGTGAGATGCGAAATAGA	GACGGCCTCAGCCTAAAAC
UT12	AK092215	TCTGTTTAAAAATTGTGGGAATAACA	CACGTCTCACTGACATCTTGC
UT13	NR_027183.1	GCAGAACAGCAGCTAAAGCA	CTCTTCCCTGTGGCAAGC
UT14	AL157455.1	CCAGTTAGCAGTATTGTCTCTGAGC	TCAAAATAGGCTAAATTCATTGTCC
UT15	AB007979.1	ATTGGCTTCTCACGTTCTGG	AAGTGGGTGAATGGCAGAAG
UT16	BC041380.1	CTCAGAGAGGGGGTGCTAACT	GACCCACATCCCTAAACTGG
UT17	AL049354.1	CCCAGAAGAGCTGAGACAAAC	GGATGGTTACACCCTGTGGA
UT18	AL049423.1	TTCATTCATTCATTCAAGTGGTG	CTGGGAAATGGAAACTGCAT
UT19	AK092810	GGGAAAGCCATGCCTAAAA	CAAAGAAACAAAAAGGAATGCAC
UT20	AK091718	TCCTTCAAAATTACCAGACTTGG	TGTCTGATTAAGTCTTTTAGCCCAAT
UT21	AK055657	CCCTCTCTGAGACTCCCAGTT	CACCACCATTTGTTCTGCTG
UT22	AK021884	GCTTGAGATAGAAATGGAGAGAAAGT	CATGGATCCTGACCTTGAGTT
UT23	NR_003367	TGAGAACTGTCCTTACGTGACC	GAGCACCAAGACTGGCTCTTA
UT24	AK123363	TCCCAACCTGTTTGTGGTTT	CCTCCCAGAAGATAAATTTTCCA
UT25	AK090827	TCCCTCCTTTTTGTTTGTGC	CACTGGGAACCAAAGTCAGG
UT26	AL832786.1	CAAAGCCAGGATTGAAGCTC	TGCAGGGGCAGTATAACGTA
UT27	AK022839	GGACACTTTACCCCAACGAC	CTCATAAGCAACTACACAGCCAGT
UT28	AL049256	GGGGCAGTTACAATGTGGAC	TGAATGTTGGTCAGCAGATGT
UT29	AK057867	CTGTAGTCTCCTGGCAGAAAAGA	CAGGTACCTCGTCTGGGACT
UT30	BX648070.1	CCTAAGTAATGGCATCACCAAA	CCTAAGTAATGGCATCACCAAA
UT31	AK094705	ACCATATTTTATGTTAATGTTCCCTTC	TTCCCTGACCTCACTTTTGTG
UT32	AK126393	ATGGGCAAACGTTCTTTGG	GGACCAGGAGAGAGGAAGGT
UT33	BX538228.1	TTGGCCTCATTTGTGCATTA	CTATCCCACCATCCCAGTACA
UT34	NR_015411.1	GCAAAGTTGCCAAAGCAAG	CTGGGGAGAGGGAGTCATTA
UT35	AK054990	TCCCTGAATGTTTTGCTGTG	GCAGGAGGTGGCAGATTG
UT36	NR_024281.1	TTGTGCTGGTGGTATGTGTG	GACATCCTCGTCACTGTGAATC
UT37	NR_015439.1	AAGCAAGTTCATCAAGAAAGCA	AACAAGTACAAGCAGCTGAGCA
UT38	AK057104	GGTCTGTACCTGAGCCTGGA	CTTCTTCCAGACAGGCGTTC
UT39	AK021734.1	GAGGTGCAGTGGGGGTAAG	CTTCGCAGGCATTCTGATG
UT40	AK055559	GTTTGATTTCTCGCAGACCAG	GCGAGGTCTAACCCAGGTG
UT41	BX647964.1	AAGATCTGTCTGCCCGTAGC	CCTCCCAGGAAAATAGAAGACC
UT42	AL359605.1	GGCACCTTCAATCCCAACT	TGAAGCTGGTTCCATCACTG
UT43	BX537481.1	ACTAGAGAGATTGTTGGGTAAAGAAGA	CTTCTGCACATAGCATTCAAGG
UT44	AK091396.1	GCCCGTAATGGAGATCGAG	CTTGAAGCCGAAGGCTCTTA
UT45	BX648677.1	GCAATTATCACGGGAAACCTAT	AAATCTTATCTGCTTCCCTATTTGTAA
UT46	AK093733	GGCCACACCGTGCTACTT	GCGCTAAAGGCAAGGTTTTAC
