# Supplementary material for: Identification and Characterization of Novel Genotoxic Stress-Inducible Nuclear Long Noncoding RNAs in Mammalian Cells
Source: PLoS One. 2012 Apr 19;7(4):e34949. doi: 10.1371/journal.pone.0034949 (PMC3330809; doi:10.1371/journal.pone.0034949)
Supplement: Table S2 — 3,180 clusters as candidates likely to encode ncRNAs. All the candidates likely to encode ncRNAs mentioned in the article were listed in the table. (XLS) [file pone.0034949.s006.xls]

## Sheet: Table S2
Table S2. 3,180 clusters as candidates likely to encode ncRNAs.
No.	#cluster_name	chrNo	cluster_size	Representative sequence ID
1	chr5+1537	chr5	967	BC064907.1
2	chr17+2801	chr17	956	AK025172
3	chr2+1497	chr2	812	D28418.1
4	chr15+889	chr15	654	BX647764.1
5	chrX_random-3	chrX_random	654	AK074449
6	chr12+3448	chr12	646	AL713650.2
7	chr3-7274	chr3	580	AK055924
8	chr4-2708	chr4	495	AK311747
9	chr20-1324	chr20	478	AK090641
10	chr22+758	chr22	468	AK127256
11	chr12+2684	chr12	459	BC082759.1
12	chr9-143	chr9	373	AL832531.1
13	chr16+3474	chr16	352	BC005385.1
14	chr14+3943	chr14	340	BC080549.1
15	chr9+1290	chr9	303	AK091718
16	chr3+7439	chr3	290	BX641108.1
17	chr3+6960	chr3	266	AL157425.1
18	chr9+4272	chr9	254	AK090539
19	chr8-2263	chr8	252	BC032347.1
20	chr7-816	chr7	242	AB032973.2
21	chr8+2273	chr8	240	AK024971
22	chr18+171	chr18	233	BX648984.1
23	chr11-3352	chr11	232	BX648468.1
24	chr12+1323	chr12	228	AL110180.1
25	chr14-1675	chr14	221	X06704.1
26	chr3+6350	chr3	213	AK094885
27	chr8-2841	chr8	213	AY264285.1
28	chr3-1082	chr3	203	AK056245
29	chr1+10145	chr1	195	AK095899
30	chr11-617	chr11	195	BC021976.2
31	chr20-1159	chr20	195	Y11165.1
32	chr6_cox_hap1-242	chr6_cox_hap1	195	AK055657
33	chr6_qbl_hap2-215	chr6_qbl_hap2	192	AK055657
34	chr11-3339	chr11	190	AK096306
35	chr9+3434	chr9	189	AK128504
36	chr7-4855	chr7	187	AK096179
37	chr17_random-52	chr17_random	185	AL137380.1
38	chr17+2161	chr17	182	AK025200
39	chr11-4084	chr11	180	AK093366
40	chr19-707	chr19	179	AL050131.1
41	chr5-6556	chr5	179	AL117555.1
42	chr7+4196	chr7	176	AK056307
43	chr12+3260	chr12	173	BC006795.1
44	chr12+906	chr12	171	AK055564
45	chr4+1760	chr4	167	D28589.1
46	chrX-83	chrX	167	AK307233
47	chr17-2547	chr17	161	BC008759.1
48	chr1+7578	chr1	158	AK092215
49	chr17-2601	chr17	158	AK057023
50	chr13-1695	chr13	157	AK308603
51	chr11-3953	chr11	155	AK025353
52	chr5-36	chr5	155	AK026101
53	chr2+1412	chr2	152	AK001814
54	chr15+189	chr15	151	AL157455.1
55	chr7+3232	chr7	147	AL833456.1
56	chr7+3992	chr7	147	AK056630
57	chr3+3853	chr3	144	AK022267
58	chr12-3780	chr12	144	AL832083.1
59	chr22+667	chr22	142	AB051458.1
60	chr7+4093	chr7	139	AL162075.1
61	chrX-462	chrX	137	BC007360.2
62	chr21+1281	chr21	133	AK074162.1
63	chr11+3681	chr11	132	AL050189.1
64	chr5+4618	chr5	132	BC017422.1
65	chr6+2594	chr6	132	AL049354.1
66	chr3-3738	chr3	132	AL049423.1
67	chr7_random+12	chr7_random	131	AK127393
68	chr12-3432	chr12	131	AK096472
69	chr2-1493	chr2	131	AK092810
70	chr15-2202	chr15	127	AL832164.1
71	chr1-2997	chr1	126	AB007979.1
72	chr17-4183	chr17	126	AK093384
73	chr17_random+83	chr17_random	125	AK021884
74	chr20-2364	chr20	124	AK026099
75	chr6+6636	chr6	124	AK094428
76	chr7-1323	chr7	123	AL713664.1
77	chr8+4332	chr8	122	BX648921.1
78	chr1_random+14	chr1_random	121	AL050202.1
79	chr8+2347	chr8	120	BX537518.1
80	chr19+3736	chr19	119	AK123363
81	chr1_random+58	chr1_random	118	AL832085.1
82	chr14-3523	chr14	117	BX537733.1
83	chr8+1779	chr8	116	AK055620
84	chr19-1752	chr19	116	AK090827
85	chr17-32	chr17	115	AL136830.1
86	chr1-6047	chr1	115	AL832786.1
87	chr5+5376	chr5	114	AL833219.1
88	chr6_cox_hap1-14	chr6_cox_hap1	113	BX537589.1
89	chr6_qbl_hap2-19	chr6_qbl_hap2	113	BX537589.1
90	chr7+1034	chr7	113	AK022839
91	chr5-3739	chr5	113	AK026295
92	chr2+6281	chr2	112	AL049256.1
93	chr18-997	chr18	112	AK126373
94	chr5+2076	chr5	111	AK098220
95	chr5-3417	chr5	110	AK091356
96	chr5+2210	chr5	109	AK098220
97	chr4+821	chr4	108	BX648830.1
98	chr8_random+64	chr8_random	108	AK098220
99	chr12-5365	chr12	108	AK057867
100	chr6-4886	chr6	107	BX537589.1
101	chr7-6600	chr7	107	AK095251
102	chr2+7210	chr2	106	BC005083.1
103	chr8-599	chr8	106	BX538233.1
104	chr17+982	chr17	105	AK091337
105	chr3-3845	chr3	105	AK126393
106	chr16-582	chr16	104	AK023660
107	chr3-3786	chr3	104	AB095938.1
108	chr9-2566	chr9	104	BX538228.1
109	chr14+1532	chr14	103	AF003522.1
110	chr4+3941	chr4	103	AL110237.1
111	chr19-2104	chr19	103	AK124278
112	chr1_random-33	chr1_random	103	BX538005.1
113	chr2-5287	chr2	103	AL157505.1
114	chr20-1944	chr20	103	AK026194
115	chr5_h2_hap1-152	chr5_h2_hap1	103	AK098220
116	chr1-1540	chr1	102	AK056963
117	chr15+2635	chr15	101	AK098360
118	chr17+1324	chr17	101	AK057473
119	chr10-2240	chr10	99	AK074271
120	chr11-1319	chr11	99	AK025115
121	chr15+3605	chr15	98	AK054710
122	chr2-4267	chr2	98	AK054990
123	chr8-4859	chr8	98	AL832535.1
124	chr17+500	chr17	97	AL050182.1
125	chr4+2068	chr4	97	AK129519
126	chr6_qbl_hap2+290	chr6_qbl_hap2	97	AK057104
127	chr7+2719	chr7	97	BC010183.2
128	chr12-3739	chr12	96	AL359940.1
129	chr17+3477	chr17	96	AK090885
130	chr6+1611	chr6	96	AK057104
131	chr6_cox_hap1+302	chr6_cox_hap1	96	AK057104
132	chr8-351	chr8	94	AL050151.1
133	chr12+118	chr12	93	AK056312
134	chr4+3862	chr4	93	AL117642.1
135	chr16-807	chr16	92	AL833498.1
136	chr2-5925	chr2	92	AK001612
137	chr5-100	chr5	92	AK021734
138	chr7-496	chr7	92	AL162065.1
139	chr3+4072	chr3	91	AK125090
140	chr4+3409	chr4	91	AK093356
141	chr19-1819	chr19	91	AK092032
142	chr17-2369	chr17	90	AK125683
143	chr11+1356	chr11	89	AK054565
144	chr18+2498	chr18	89	AK001829
145	chr7+6209	chr7	89	AL359620.1
146	chr2+6874	chr2	88	BX538254.1
147	chr17-4644	chr17	88	AK074580
148	chr19-2087	chr19	88	AK055559
149	chr9+1400	chr9	87	AK023620
150	chr14-3348	chr14	87	BX647964.1
151	chr17-2848	chr17	86	AK128436
152	chr2-6747	chr2	86	AK094167
153	chr12+2396	chr12	85	AL137310.1
154	chr2-4668	chr2	85	BC000596.1
155	chr13+168	chr13	84	AK130366
156	chr22+747	chr22	84	AK057443
157	chr4+1537	chr4	84	AK056974
158	chr5+5126	chr5	84	AL137734.1
159	chr7+5881	chr7	84	AL359605.1
160	chr14-3161	chr14	84	AK097779
161	chr15+1389	chr15	83	BX537481.1
162	chr2+5018	chr2	83	AK025716
163	chr5+309	chr5	83	AK095831
164	chrX+2335	chrX	83	AK124702
165	chr11+169	chr11	82	AK074614
166	chr16+1469	chr16	81	AK027225
167	chr10-1630	chr10	81	AK091396
168	chr2-6478	chr2	81	BX641060.1
169	chr9-1776	chr9	81	AL390170.1
170	chr1-4287	chr1	80	BX649117.1
171	chr5-2278	chr5	80	BX648677.1
172	chr16+3797	chr16	79	AK095707
173	chr2+6897	chr2	79	AK093733
174	chr16-832	chr16	79	AK057096
175	chr15+3302	chr15	78	BX538250.1
176	chr3+673	chr3	78	AL133111.1
177	chr5+5129	chr5	78	AK093957
178	chr8-4297	chr8	78	AK125860
179	chr17-5000	chr17	77	BC007813.2
180	chr4-5332	chr4	77	AK074776
181	chr20+792	chr20	76	AK024594
182	chr1-3868	chr1	76	BC010117.2
183	chr15-3047	chr15	76	AK092547
184	chr11+494	chr11	75	BC096750.1
185	chr11-3397	chr11	75	AK001998
186	chr3-171	chr3	75	AK097068
187	chr5+558	chr5	74	AK097784
188	chr1+5943	chr1	73	BC026270.1
189	chr19+2232	chr19	73	BX647800.1
190	chrX+1620	chrX	73	AK054940
191	chr2-5680	chr2	73	XM_496572.1
192	chr5-5689	chr5	73	AK001058
193	chrX+3017	chrX	72	NR_002203.1
194	chr13+2388	chr13	72	BX537667.1
195	chr5+289	chr5	72	BX648541.1
196	chr10+4031	chr10	71	AK025166
197	chr16+2909	chr16	71	AK098273
198	chr4+4911	chr4	69	AK124244
199	chr11-167	chr11	69	AL833360.1
200	chr8+3593	chr8	68	AL832582.1
201	chr2+4416	chr2	68	AL831825.1
202	chrX+1677	chrX	68	AK056172
203	chr12-702	chr12	68	BX537644.1
204	chr15-1349	chr15	68	AK056376
205	chr18-1048	chr18	68	AK090499
206	chr2+3703	chr2	67	AL137717.1
207	chr20+1903	chr20	67	AK055067
208	chr3-3731	chr3	67	AK001020
209	chr11+707	chr11	66	AK057835
210	chr22+107	chr22	66	AK026026
211	chr7+6038	chr7	66	AK172840
212	chr11-3295	chr11	66	AK091796
213	chr1_random-29	chr1_random	66	AL080213.1
214	chr5-5518	chr5	66	AK000901
215	chr7-1505	chr7	66	AK309708
216	chr8-389	chr8	66	AK307073
217	chr1+1129	chr1	65	AK096098
218	chr1-9275	chr1	65	AL832122.1
219	chr16-1808	chr16	65	BC034401.2
220	chr2-4660	chr2	65	AL049964.1
221	chr15-2895	chr15	64	AL137570.1
222	chr16+4258	chr16	64	AK097694
223	chr17+3459	chr17	64	AK307360
224	chr3+1227	chr3	64	AK093863
225	chr6+3726	chr6	64	AK025621
226	chr7-200	chr7	64	AK091942
227	chr8-2166	chr8	64	BX538329.1
228	chr1+5062	chr1	63	BX538249.1
229	chr7+1800	chr7	63	AK092709
230	chr1-10526	chr1	63	BC013276.1
231	chr4-2641	chr4	63	BX538341.1
232	chrX-1532	chrX	63	BX649033.1
233	chr19+3866	chr19	62	AK125275
234	chr5-5283	chr5	62	AK056817
235	chr11+3600	chr11	61	XM_497311.1
236	chr6-213	chr6	61	AL049237.1
237	chr16+2809	chr16	61	AK057513
238	chr21+1032	chr21	61	AK023647
239	chr7+1461	chr7	61	AK055594
240	chr7-1602	chr7	61	BC024231.1
241	chr14+3303	chr14	60	AK094555
242	chr12+580	chr12	60	AK096301
243	chr13+1518	chr13	60	AK095358
244	chr9+2275	chr9	60	AK125162
245	chr19-1403	chr19	60	AK092778
246	chr5-5271	chr5	60	AK097396
247	chr5-6236	chr5	60	AK124354
248	chr2+3209	chr2	59	AK123453
249	chr5+6097	chr5	59	AK125077
250	chrX+2220	chrX	59	AK095034
251	chrX-1508	chrX	59	AK057701
252	chr20+294	chr20	58	AK123831
253	chr15-1663	chr15	58	AK124301
254	chr7-2427	chr7	58	AK123595
255	chr11+1922	chr11	56	U28424.1
256	chr11+2920	chr11	56	AK057093
257	chr3+3944	chr3	56	AK055934
258	chr3+7601	chr3	56	AK124168
259	chr7+2761	chr7	56	AK021477
260	chr11-3222	chr11	56	AK124141
261	chr17-1188	chr17	56	AK124426
262	chr17-2573	chr17	56	AK057121
263	chr3-1617	chr3	56	AK055675
264	chr3-7545	chr3	56	AK075038
265	chr19-3513	chr19	55	AK125508
266	chr4+2508	chr4	55	AK130099
267	chr6_cox_hap1-261	chr6_cox_hap1	55	AK057215
268	chr7-4382	chr7	55	BC066990.1
269	chr7-5384	chr7	55	AK125029
270	chr9-960	chr9	55	AK021820
271	chr14+280	chr14	54	AK092855
272	chr9+1842	chr9	54	AL117607.1
273	chr1-9220	chr1	54	AK124839
274	chr14-3096	chr14	54	BC007251.1
275	chr3-3869	chr3	54	AK025066
276	chr7-5508	chr7	54	AK026723
277	chr14+3394	chr14	53	AK091547
278	chr17+3335	chr17	53	AK129803
279	chr2+8285	chr2	53	AL137534.1
280	chr22+1691	chr22	53	AK054703
281	chr3+3034	chr3	53	AK124742
282	chr4+4517	chr4	53	AK124396
283	chr7+2750	chr7	53	AK021477
284	chr9+699	chr9	53	AK024898
285	chr17-5018	chr17	53	AK056769
286	chr1+6692	chr1	52	M35718.1
287	chr10+4678	chr10	52	AL049387.1
288	chr12+3153	chr12	52	AL049435.1
289	chr17+4331	chr17	52	AK056975
290	chr19+2893	chr19	52	AK309505
291	chr2+7986	chr2	52	AK125247
292	chr3+5538	chr3	52	AK056386
293	chr3+7041	chr3	52	AK057000
294	chr5+6420	chr5	52	AK026811
295	chr16-3843	chr16	52	X96660.1
296	chr4-1385	chr4	52	AK001013
297	chr4-2097	chr4	52	AK026192
298	chr5-3665	chr5	52	AK096014
299	chr9-1187	chr9	52	AK123875
300	chr1+6370	chr1	51	AK125462
301	chr1+10371	chr1	51	AK094245
302	chr2+4240	chr2	51	AL137513.1
303	chr1-4416	chr1	51	AK125462
304	chr10-4461	chr10	51	AK097405
305	chr11-314	chr11	51	AK096370
306	chr3-1740	chr3	51	AK025367
307	chr3-5164	chr3	51	AK094634
308	chr6-2562	chr6	51	AK124400
309	chr11-535	chr11	50	AK095791
310	chr6-996	chr6	50	AK091594
311	chr8-1675	chr8	50	AL050061.1
312	chr3+3050	chr3	49	AK056845
313	chr6+1186	chr6	49	AK054919
314	chr8+1787	chr8	49	AK056481
315	chr8+2038	chr8	49	AK094693
316	chr2-248	chr2	49	AK057399
317	chr7-4752	chr7	49	AK127081
318	chrX_random-47	chrX_random	49	AK023454
319	chr2+3812	chr2	48	AK092980
320	chr2+4905	chr2	48	AK098264
321	chr3+4088	chr3	48	AK095647
322	chr1-8238	chr1	48	AK054902
323	chr11-1151	chr11	48	AK127703
324	chr12-1397	chr12	48	AK126405
325	chr15-3410	chr15	48	AK000890
326	chr3-6428	chr3	48	AK095937
327	chr9+1621	chr9	47	BC032035.1
328	chr7-2443	chr7	47	BC012751.2
329	chr2+3245	chr2	47	BC009264.2
330	chrM+2	chrM	47	AK026901
331	chrX+2963	chrX	47	AK054921
332	chr1-1785	chr1	47	AK123264
333	chr10-3338	chr10	47	AK055418
334	chr2-1282	chr2	47	AK126298
335	chr8-912	chr8	47	AK075052
336	chr9-3247	chr9	47	AL713639.1
337	chr19+1269	chr19	46	AK094229
338	chr8+2494	chr8	46	AK123390
339	chr2-5130	chr2	46	AK096498
340	chr3+6813	chr3	45	BX640629.1
341	chr17+2144	chr17	45	AK092875
342	chr7+1215	chr7	45	AK094250
343	chr7+4996	chr7	45	AL110181.1
344	chr8+3564	chr8	45	AK095151
345	chr1-4871	chr1	45	AF172850.1
346	chr11-1496	chr11	45	AL137566.1
347	chr15-2441	chr15	45	AK056606
348	chr15-3808	chr15	45	AK093628
349	chr20-663	chr20	45	AK126976
350	chr5-2331	chr5	45	AK126569
351	chr11+150	chr11	44	AL832075.1
352	chr5-6563	chr5	44	BC029796.1
353	chr1+7100	chr1	44	AK026213
354	chr12+4190	chr12	44	AK056164
355	chr15+1728	chr15	44	AL713736.1
356	chr22+590	chr22	44	XM_372900.2
357	chr5+6394	chr5	44	AK095170
358	chr6+2589	chr6	44	AK095117
359	chr8+4224	chr8	44	AK056899
360	chr1-2385	chr1	44	AK093982
361	chr12-1997	chr12	44	AK026881
362	chr12-3998	chr12	44	BX648207.1
363	chr15-1960	chr15	44	AK093077
364	chr1+1364	chr1	43	AK095664
365	chr1+4415	chr1	43	AK024926
366	chr2+5174	chr2	43	BX648270.1
367	chr6+83	chr6	43	AK091028
368	chr7+3723	chr7	43	BC037849.2
369	chr14-2768	chr14	43	AK090972
370	chr6-4307	chr6	43	AK074567
371	chr7-2405	chr7	43	AK094372
372	chr5-1994	chr5	42	BC001694.2
373	chr14+3882	chr14	42	AK125003
374	chr15+804	chr15	42	AK130410
375	chr17+3214	chr17	42	AK123714
376	chr2+1560	chr2	42	AK090796
377	chr5+358	chr5	42	AK023999
378	chr9+1197	chr9	42	AL832569.1
379	chr10-1649	chr10	42	BC003519.1
380	chr15-2533	chr15	42	AL833463.1
381	chr15-2601	chr15	42	AK129542
382	chr15-3860	chr15	42	AK094982
383	chr2-4350	chr2	42	AK095788
384	chr8-5052	chr8	42	AK025595
385	chr1-1023	chr1	41	AL137511.1
386	chr1+5831	chr1	41	AK056396
387	chr12+368	chr12	41	AK124568
388	chr18+1050	chr18	41	AK055244
389	chr18+1260	chr18	41	AK126277
390	chr2+920	chr2	41	AK127582
391	chr22+1093	chr22	41	AK097136
392	chr3+1851	chr3	41	AK124776
393	chr5+479	chr5	41	AK129556
394	chr6+5390	chr6	41	AK124757
395	chr12-4569	chr12	41	AK090817
396	chr11-1231	chr11	40	AL050204.1
397	chr17+756	chr17	40	AK094349
398	chr17+3462	chr17	40	AK124534
399	chr11-3602	chr11	40	AK124475
400	chr15-94	chr15	40	AK126286
401	chr2-3546	chr2	40	AK128708
402	chr8-4176	chr8	40	BC002421.2
403	chr12+3643	chr12	39	AK024560
404	chr1+7844	chr1	39	AK025846
405	chr1+9860	chr1	39	AK124970
406	chr17+4605	chr17	39	AK054729
407	chr3+4982	chr3	39	AK024653
408	chr4+1626	chr4	39	AK124778
409	chr12-1459	chr12	39	AK055712
410	chr17-4848	chr17	39	AK056724
411	chr22-1889	chr22	39	AK093346
412	chr7-869	chr7	38	AK129584
413	chr19+1213	chr19	38	AK024303
414	chr11+573	chr11	38	AK098060
415	chr11+631	chr11	38	AK055888
416	chr16+3866	chr16	38	AK127374
417	chr20+596	chr20	38	AK095658
418	chr20+1207	chr20	38	AK095753
419	chr3+5844	chr3	38	AK130903
420	chr12-1026	chr12	38	BC007399.2
421	chr16-132	chr16	38	BC009880.2
422	chr1+10909	chr1	37	AK095500
423	chr12+5057	chr12	37	AK091766
424	chr13+122	chr13	37	BX648740.1
425	chr14+1709	chr14	37	AK055647
426	chr20+2556	chr20	37	AK056098
427	chr7+6499	chr7	37	AL713756.1
428	chr2-1723	chr2	37	AK095236
429	chr3-3260	chr3	37	AK092629
430	chr4-1506	chr4	37	BX537715.1
431	chr12+911	chr12	36	AK057955
432	chr12+4048	chr12	36	AK057269
433	chr15+2691	chr15	36	AK094651
434	chr2+677	chr2	36	AK054572
435	chr2+3817	chr2	36	AK024144
436	chr3+6040	chr3	36	AK026659
437	chr6+2634	chr6	36	AK094940
438	chr6+6035	chr6	36	AK123370
439	chr11-1771	chr11	36	AK096912
440	chr11-5219	chr11	36	AK000908
441	chr15-2735	chr15	36	AK002043
442	chr2-5107	chr2	36	AK058000
443	chr3-1032	chr3	36	AL831863.1
444	chrX-1391	chrX	36	AK026301
445	chr11+4449	chr11	35	AK130291
446	chr7-6521	chr7	35	AL713633.1
447	chr1+7188	chr1	35	AK094384
448	chr3+3062	chr3	35	AL832788.1
449	chr9+1108	chr9	35	AK125920
450	chrX+1978	chrX	35	AK098473
451	chr12-188	chr12	35	AK056047
452	chr16-3434	chr16	35	AK124698
453	chr21-823	chr21	35	AK123722
454	chr3-2805	chr3	34	AK025851
455	chr14+3620	chr14	34	AK094562
456	chr16+3386	chr16	34	AK125142
457	chr7+5338	chr7	34	AK123638
458	chr1-1581	chr1	34	AK092887
459	chr11-1426	chr11	34	AK094744
460	chr11-5708	chr11	34	AK123483
461	chr12-1348	chr12	34	AK027820
462	chr13-2185	chr13	34	AK021638
463	chr19-2552	chr19	34	AK124095
464	chr21-182	chr21	34	AK127364
465	chr4-4056	chr4	34	AK125335
466	chr7-2222	chr7	34	AK091347
467	chr16+1272	chr16	33	AK024121
468	chr1-3081	chr1	33	AK130460
469	chr1+2322	chr1	33	AK095035
470	chr1+6228	chr1	33	AK023548
471	chr10+4489	chr10	33	AL831850.1
472	chr11+612	chr11	33	BC028123.1
473	chr14+213	chr14	33	AK093277
474	chr2+5570	chr2	33	BX648102.1
475	chr3+4696	chr3	33	BX648813.1
476	chr5+3284	chr5	33	AK093521
477	chr1-8394	chr1	33	AL162073.1
478	chr19+2107	chr19	32	XM_498715.1
479	chr7+4992	chr7	32	BX640852.1
480	chr2-5536	chr2	32	AK098629
481	chr2-8310	chr2	32	BC073777.1
482	chr9+1364	chr9	32	AK125471
483	chr2+9283	chr2	32	BC017907.1
484	chr1+6234	chr1	32	AK000992
485	chr11+531	chr11	32	AK126806
486	chr12+3896	chr12	32	AK094517
487	chr12+5639	chr12	32	AK091521
488	chr14+755	chr14	32	AK057476
489	chr17+384	chr17	32	AK056005
490	chr17+4575	chr17	32	AK093500
491	chr18+2213	chr18	32	AL512695.1
492	chr19+1099	chr19	32	BX537706.1
493	chr3+1882	chr3	32	AK055655
494	chr4+516	chr4	32	BC004397.1
495	chrX+3054	chrX	32	AK126415
496	chr11-2395	chr11	32	AK054718
497	chr12-905	chr12	32	AK094730
498	chr15-981	chr15	32	AK124939
499	chr2-4676	chr2	32	BC005070.1
500	chr21-1228	chr21	32	BX537735.1
501	chr3-1739	chr3	32	AK056401
502	chr3-4610	chr3	32	AK097190
503	chr6-4351	chr6	32	AL110255.1
504	chr7-6112	chr7	32	AK092521
505	chr15+949	chr15	31	AK057625
506	chr15+1397	chr15	31	AK023328
507	chr15+1481	chr15	31	AK125687
508	chr17+2296	chr17	31	AK098252
509	chr18+1792	chr18	31	AK124558
510	chr19+2162	chr19	31	AK094324
511	chr19+3525	chr19	31	AK055160
512	chr4+4184	chr4	31	AK093416
513	chr1-3124	chr1	31	AK021543
514	chr1-4930	chr1	31	AK022804
515	chr13-754	chr13	31	AK125269
516	chr2-8210	chr2	31	AK092250
517	chr5-2672	chr5	31	AK096154
518	chr8-485	chr8	31	AL833303.1
519	chr20+1450	chr20	30	U06680.1
520	chr1+8220	chr1	30	AK056155
521	chr11+3963	chr11	30	AK055250
522	chr14+1422	chr14	30	BX537721.2
523	chr20+85	chr20	30	AK055993
524	chr3+7519	chr3	30	AK123610
525	chr7+10	chr7	30	AK024243
526	chr7+1592	chr7	30	AK130649
527	chr12-857	chr12	30	BX648958.1
528	chr14-539	chr14	30	AK097876
529	chr15-1382	chr15	30	AK055007
530	chr15-2952	chr15	30	BX537526.1
531	chr18-1726	chr18	30	BX648566.1
532	chr19-2090	chr19	30	AK022299
533	chr2-700	chr2	30	AK056332
534	chr22-382	chr22	30	AK055463
535	chr22-1971	chr22	30	AK021851
536	chr5-3060	chr5	30	AK093265
537	chr6-1915	chr6	30	AK091630
538	chr7-1313	chr7	30	AK054623
539	chr9-1643	chr9	30	AK095652
540	chr12+278	chr12	29	M31520.1
541	chr11-1739	chr11	29	AF217518.1
542	chr1+7209	chr1	29	AK023394
543	chr12+5322	chr12	29	AK123448
544	chr18+326	chr18	29	AK127824
545	chr2+7917	chr2	29	AK127714
546	chr20+2588	chr20	29	AK054637
547	chr3+5393	chr3	29	AK095534
548	chr5+5158	chr5	29	BX648997.1
549	chr9+2220	chr9	29	AK095210
550	chr1-6880	chr1	29	AK091300
551	chr13-2867	chr13	29	AK090664
552	chr15-641	chr15	29	AK094929
553	chr15-3802	chr15	29	AK094557
554	chr17-261	chr17	29	AL832796.1
555	chr4-3263	chr4	29	AK125386
556	chr5-2850	chr5	29	BC011940.2
557	chr6-1295	chr6	29	AK124173
558	chr7-5705	chr7	29	BX648247.1
559	chrX-1511	chrX	29	AK128300
560	chr19+3017	chr19	28	AK057858
561	chr20+231	chr20	28	BC008667.1
562	chr11+4616	chr11	28	AK125645
563	chr17-3905	chr17	28	AL137568.1
564	chr1+2512	chr1	28	AK094134
565	chr1+6053	chr1	28	AL833369.1
566	chr2+121	chr2	28	AK023018
567	chr21+1364	chr21	28	AL390181.1
568	chr3+2052	chr3	28	AK091264
569	chr7+5095	chr7	28	AK123730
570	chr9+121	chr9	28	AK055212
571	chr9+4646	chr9	28	AK092192
572	chr10-5405	chr10	28	AK126513
573	chr11-1798	chr11	28	AK022848
574	chr14-460	chr14	28	BX647564.1
575	chr19-2590	chr19	28	AK095221
576	chr2-7753	chr2	28	AK095013
577	chr20-970	chr20	28	AK055783
578	chr5-3854	chr5	28	AK129849
579	chr6-2737	chr6	28	AK055101
580	chr7-4956	chr7	28	BX537586.1
581	chr15-1526	chr15	27	AL080151.1
582	chr20-358	chr20	27	AK024545
583	chr3+4886	chr3	27	AK097508
584	chr1-4529	chr1	27	AK091688
585	chr10-5033	chr10	27	AK096685
586	chr12-336	chr12	27	AK023485
587	chr14-1432	chr14	27	AK094873
588	chr16-616	chr16	27	AK094336
589	chr16-2143	chr16	27	AK125571
590	chr16-3138	chr16	27	AK093967
591	chr17-119	chr17	27	AK026523
592	chr17-4298	chr17	27	AK123263
593	chr2-2883	chr2	27	AK055616
594	chr6-5942	chr6	27	AK024681
595	chr1-8677	chr1	26	BX648622.1
596	chr1+5404	chr1	26	AK092511
597	chr10+4326	chr10	26	AL050035.1
598	chr11+973	chr11	26	AL137366.1
599	chr11+5571	chr11	26	AK095081
600	chr12+261	chr12	26	AK023752
601	chr12+863	chr12	26	AK094655
602	chr12+1793	chr12	26	AK123102
603	chr13+1684	chr13	26	AK097469
604	chr13+1946	chr13	26	BX647243.1
605	chr14+2207	chr14	26	AK096500
606	chr16+2866	chr16	26	AK056683
607	chr18+1474	chr18	26	AK090802
608	chr2+6152	chr2	26	AK027541
609	chr21+538	chr21	26	AK056384
610	chr3+323	chr3	26	AK022202
611	chr3+4792	chr3	26	AK096580
612	chr4+4598	chr4	26	BX537573.1
613	chr7+5832	chr7	26	AK026372
614	chr9+3377	chr9	26	AK055719
615	chrX_random+27	chrX_random	26	AK125688
616	chr11-2119	chr11	26	AK092827
617	chr11-4956	chr11	26	AK001432
618	chr15-3792	chr15	26	AK093166
619	chr17-2042	chr17	26	AK127217
620	chr17-2525	chr17	26	AK056941
621	chr18-285	chr18	26	AK123319
622	chr3-1361	chr3	26	AK094547
623	chr3-7414	chr3	26	AK094210
624	chr7-2590	chr7	26	AK096084
625	chr9-1782	chr9	26	AK055231
626	chr3+6460	chr3	25	AL137571.1
627	chr8-5234	chr8	25	AK024566
628	chrX-187	chrX	25	AK025525
629	chr11+4367	chr11	25	AK094117
630	chr2+4441	chr2	25	AK123708
631	chr20+505	chr20	25	AK124279
632	chr22+694	chr22	25	AK124562
633	chr5+3878	chr5	25	AK026718
634	chr5+4472	chr5	25	AK310493
635	chr8+1507	chr8	25	AK090578
636	chr9+1607	chr9	25	XM_497029.1
637	chrX_random+10	chrX_random	25	AK055676
638	chr1-5029	chr1	25	BX647355.1
639	chr1-7445	chr1	25	AK057652
640	chr13-2947	chr13	25	AK092600
641	chr2-1411	chr2	25	BX538248.1
642	chr2-9120	chr2	25	AK090737
643	chr22-232	chr22	25	AL137569.1
644	chr3-2730	chr3	25	BX647299.1
645	chr3-5540	chr3	25	AK095091
646	chr4-1179	chr4	25	AK057233
647	chr7-811	chr7	25	AK098171
648	chr9-75	chr9	25	AK097764
649	chr8+2561	chr8	24	AL833348.1
650	chr11-824	chr11	24	AK026219
651	chr11+84	chr11	24	AK091506
652	chr12+2266	chr12	24	AK055142
653	chr12+2713	chr12	24	AL831869.1
654	chr13+1039	chr13	24	AK001938
655	chr14+1805	chr14	24	AK124004
656	chr15+3400	chr15	24	AK090951
657	chr16+336	chr16	24	AK056451
658	chr19+1230	chr19	24	AK096732
659	chr2+860	chr2	24	AK091483
660	chr2+1611	chr2	24	AK126414
661	chr2+2461	chr2	24	AK123369
662	chr21+1378	chr21	24	AK097995
663	chr22+1053	chr22	24	BC004550.2
664	chr22+2258	chr22	24	AK094442
665	chr3+6274	chr3	24	XM_376281.2
666	chr4+2559	chr4	24	AF388200.1
667	chr4+4132	chr4	24	AK094986
668	chr4+4756	chr4	24	AL137273.1
669	chr5+2181	chr5	24	AK130705
670	chr6+471	chr6	24	AK092393
671	chr6+1342	chr6	24	AK097713
672	chr6+2573	chr6	24	AK094609
673	chr6_cox_hap1+38	chr6_cox_hap1	24	AK097713
674	chr6_qbl_hap2+26	chr6_qbl_hap2	24	AK097713
675	chr7+4239	chr7	24	AK311374
676	chr9+1659	chr9	24	BC006438.1
677	chr10-772	chr10	24	AK091348
678	chr10-961	chr10	24	AK097703
679	chr11-2790	chr11	24	AK125463
680	chr17-974	chr17	24	AK124847
681	chr19-3213	chr19	24	AK125037
682	chr2-4879	chr2	24	AK123708
683	chr3-5776	chr3	24	AK125500
684	chr4-2189	chr4	24	AK123292
685	chr5-618	chr5	24	AK055811
686	chr6-2141	chr6	24	AK124281
687	chr6_cox_hap1-100	chr6_cox_hap1	24	AK054612
688	chr6_qbl_hap2-92	chr6_qbl_hap2	24	AK054612
689	chr7-1478	chr7	24	AK124322
690	chr7-2426	chr7	24	AK126130
691	chr8-2559	chr8	24	AK123531
692	chrX-439	chrX	24	AL713746.1
693	chr16+1980	chr16	23	AK131031
694	chr22-1286	chr22	23	AK025129
695	chr3-2244	chr3	23	AK130469
696	chr1+3943	chr1	23	BX648061.1
697	chr1+5871	chr1	23	AK311108
698	chr11+4906	chr11	23	AK130019
699	chr12+4225	chr12	23	AK123210
700	chr17+3303	chr17	23	AK090797
701	chr17_random+43	chr17_random	23	AK027091
702	chr2+553	chr2	23	AK022396
703	chr2+4188	chr2	23	AK055877
704	chr3+3012	chr3	23	AK126350
705	chr5+474	chr5	23	AK130706
706	chr6+4624	chr6	23	AK023584
707	chr6+6438	chr6	23	AK093454
708	chr8+1439	chr8	23	AK024272
709	chr1-3769	chr1	23	AK057554
710	chr1-4321	chr1	23	AK129725
711	chr1-8687	chr1	23	AK126027
712	chr10-4371	chr10	23	AL080132.1
713	chr12-3863	chr12	23	AK123977
714	chr13-1789	chr13	23	AK096522
715	chr15-751	chr15	23	AK129775
716	chr17-5003	chr17	23	AK000038
717	chr17_random-110	chr17_random	23	AK027091
718	chr22-510	chr22	23	AK128410
719	chr22-1881	chr22	23	BC039313.1
720	chr3-6419	chr3	23	AK093984
721	chr6-4963	chr6	23	AK054612
722	chr6-4964	chr6	23	AK054612
723	chr6_qbl_hap2-240	chr6_qbl_hap2	23	AK055123
724	chr9-547	chr9	23	AK056037
725	chrX-375	chrX	23	AK095353
726	chr1+4414	chr1	22	AK125723
727	chr11+896	chr11	22	AK123657
728	chr11+1196	chr11	22	AY054403.4
729	chr12+862	chr12	22	AK097936
730	chr12+1735	chr12	22	AL117598.1
731	chr13+2245	chr13	22	AK055459
732	chr14+3184	chr14	22	BC033643.1
733	chr17+314	chr17	22	AK091008
734	chr17+4545	chr17	22	AK123944
735	chr17_random+5	chr17_random	22	AK127393
736	chr18+137	chr18	22	BC005130.2
737	chr2+2401	chr2	22	AL832565.1
738	chr2+2793	chr2	22	AK023375
739	chr2+3211	chr2	22	AK123865
740	chr2+3311	chr2	22	AK125315
741	chr4+2015	chr4	22	AK094703
742	chr4+4085	chr4	22	AL833449.1
743	chr5+3090	chr5	22	AK055966
744	chr6+764	chr6	22	AK091312
745	chr7+86	chr7	22	AK090593
746	chr9+4283	chr9	22	AK021895
747	chr17-3220	chr17	22	AK097122
748	chr17-4374	chr17	22	AK127533
749	chr18-1716	chr18	22	AK123079
750	chr19-22	chr19	22	AK124458
751	chr2-134	chr2	22	AL832402.1
752	chr2-4307	chr2	22	AK123452
753	chr2-4978	chr2	22	BC004487.2
754	chr2-7362	chr2	22	AK094343
755	chr20-1991	chr20	22	AF161557.1
756	chr4-5089	chr4	22	AK058104
757	chr5-1273	chr5	22	AK127442
758	chr6-3632	chr6	22	AL831827.1
759	chr8-3193	chr8	22	AK055621
760	chr2+4312	chr2	21	XM_376111.1
761	chr7+3862	chr7	21	BX648200.1
762	chr10-3444	chr10	21	AK130022
763	chr1+5138	chr1	21	AK125759
764	chr1+6010	chr1	21	BX647792.1
765	chr1+8933	chr1	21	AK130276
766	chr2+7729	chr2	21	AK130065
767	chr4+3292	chr4	21	BX647987.1
768	chr4+3972	chr4	21	XM_293671.4
769	chr4+4142	chr4	21	AK090904
770	chr5+2488	chr5	21	AK094995
771	chr6+3693	chr6	21	AK091365
772	chr8+1299	chr8	21	AK056779
773	chr9+3389	chr9	21	AK056351
774	chr1-7766	chr1	21	AK090467.1
775	chr1-9662	chr1	21	AK124686
776	chr11-1315	chr11	21	AK098142
777	chr12-4957	chr12	21	BX649153.1
778	chr15-111	chr15	21	AK095793
779	chr2-317	chr2	21	AK056246
780	chr2-1060	chr2	21	AK090954
781	chr22-944	chr22	21	AK123431
782	chr3_random-11	chr3_random	21	AK092129
783	chr4-3269	chr4	21	AL117627.1
784	chr5-3144	chr5	21	AK093529
785	chr5_h2_hap1-120	chr5_h2_hap1	21	AK130705
786	chr7-1496	chr7	21	AK123679
787	chr8-3797	chr8	21	AK025743
788	chrM-0	chrM	21	AK026510
789	chr2-8825	chr2	20	AK025063
790	chr8-5041	chr8	20	AK057771
791	chr17+1495	chr17	20	AL157421.1
792	chr10+413	chr10	20	AK095787
793	chr11+3456	chr11	20	AK123295
794	chr14+321	chr14	20	AK094345
795	chr14+2635	chr14	20	AK025117
796	chr2+767	chr2	20	AK130860
797	chr2+7378	chr2	20	AK023739
798	chr3+699	chr3	20	AK096254
799	chr4+5394	chr4	20	AK126205
800	chr5+1426	chr5	20	AK097893
801	chr5+2959	chr5	20	AL050132.1
802	chr5+5747	chr5	20	AK098705
803	chr6+166	chr6	20	AK096219
804	chr6+5728	chr6	20	AK021558
805	chr8+38	chr8	20	BC022082.1
806	chr9+317	chr9	20	AK123408
807	chr9+3799	chr9	20	AL833059.1
808	chr1-5507	chr1	20	AK124307
809	chr11-1295	chr11	20	AK090719
810	chr15-4287	chr15	20	AL832227.1
811	chr16-189	chr16	20	AK092901
812	chr19-2114	chr19	20	AK022793
813	chr19-2739	chr19	20	AL832183.1
814	chr2-152	chr2	20	AK092442
815	chr4-3459	chr4	20	AK022086
816	chr8-3906	chr8	20	AK057935
817	chr9-3814	chr9	20	AK123449
818	chr17+4514	chr17	19	AK131023
819	chr5+5722	chr5	19	XM_293903.5
820	chr7-1897	chr7	19	AF400039.1
821	chr18+1809	chr18	19	AK058035
822	chr11-1354	chr11	19	AY358231.1
823	chr13+1162	chr13	19	AK095119
824	chr14+1025	chr14	19	AK095070
825	chr15+2900	chr15	19	AK307159
826	chr16+2408	chr16	19	AK021701
827	chr17+2173	chr17	19	AK090935
828	chr18+1145	chr18	19	AK057518
829	chr19+1764	chr19	19	BX647231.1
830	chr2+1927	chr2	19	AK023572
831	chr2+8284	chr2	19	AK091571
832	chr20+1005	chr20	19	AK091765
833	chr3+502	chr3	19	AK123253
834	chr3+6410	chr3	19	AK093355
835	chr3+6979	chr3	19	BX641067.1
836	chr4+3788	chr4	19	AK021894
837	chr4+5087	chr4	19	AK095255
838	chr5+199	chr5	19	AK125283
839	chr5+2006	chr5	19	AK311046
840	chr6+143	chr6	19	AK097187
841	chr6+6081	chr6	19	AK024874
842	chr8+4439	chr8	19	AK023601
843	chr9+1639	chr9	19	AK123449
844	chr13-149	chr13	19	AK057085
845	chr17-837	chr17	19	AK093963
846	chr2-5313	chr2	19	AK022249
847	chr2-5691	chr2	19	AK124303
848	chr21_random-24	chr21_random	19	AK001448
849	chr3-1411	chr3	19	AL833309.1
850	chr4-1470	chr4	19	AK124941
851	chr5-5463	chr5	19	AK093278
852	chr5_h2_hap1-81	chr5_h2_hap1	19	AK311046
853	chr6-1118	chr6	19	AK093151
854	chr6-4829	chr6	19	AK057709
855	chr7-421	chr7	19	AK127717
856	chr7-4649	chr7	19	AK123446
857	chr8-4284	chr8	19	AK125621
858	chr9-3315	chr9	19	AK123449
859	chr9-3579	chr9	19	BC011779.2
860	chr1+7256	chr1	18	BC018064.1
861	chr15+2878	chr15	18	BC010081.2
862	chr16+1273	chr16	18	AK026647
863	chr18+1482	chr18	18	AF125100.1
864	chr18+1911	chr18	18	AK026459
865	chr7+5144	chr7	18	BC045576.1
866	chr21-111	chr21	18	BC004343.1
867	chr5-1911	chr5	18	AF071111.1
868	chr8-4767	chr8	18	BX537656.1
869	chr5_h2_hap1+105	chr5_h2_hap1	18	AK130705
870	chr1+3468	chr1	18	AB007954.1
871	chr1+5468	chr1	18	BX648855.1
872	chr1+7426	chr1	18	BC009228.2
873	chr10+33	chr10	18	AK090669
874	chr12+2935	chr12	18	AK024262
875	chr12+5500	chr12	18	AK127402
876	chr12+5694	chr12	18	BC014265.2
877	chr16+2582	chr16	18	AK309303
878	chr17+703	chr17	18	AK097500
879	chr17_random+122	chr17_random	18	AL137616.1
880	chr18+1572	chr18	18	AK123464
881	chr19+2256	chr19	18	AK055335
882	chr2+6103	chr2	18	AK126410
883	chr6+4174	chr6	18	AK025312
884	chr7+683	chr7	18	AK096065
885	chr7+5683	chr7	18	AK297725
886	chr7_random+21	chr7_random	18	AK126475
887	chr8+1805	chr8	18	AK097475
888	chr8+2285	chr8	18	AL137390.1
889	chrX+2740	chrX	18	AK094635
890	chr1-222	chr1	18	AK126649
891	chr1-1556	chr1	18	AK096113
892	chr1-4412	chr1	18	BX648801.1
893	chr12-4317	chr12	18	AK096360
894	chr14-2164	chr14	18	AK124598
895	chr14-2711	chr14	18	AK056212
896	chr14-3575	chr14	18	AK123811
897	chr16-571	chr16	18	AK093002
898	chr17-1426	chr17	18	AK311448
899	chr18-681	chr18	18	AK057336
900	chr18-1163	chr18	18	AK090603
901	chr19-94	chr19	18	AK091350
902	chr3-6227	chr3	18	AK096537
903	chr4-2548	chr4	18	AK091502
904	chr8-3790	chr8	18	AK292340
905	chr9-800	chr9	18	AK124330
906	chr10+1949	chr10	17	BX649150.1
907	chr11+118	chr11	17	BX647227.1
908	chr17+3082	chr17	17	BX641027.1
909	chrX+1610	chrX	17	NR_002309.1
910	chr11-3299	chr11	17	AF257238.1
911	chr14+1269	chr14	17	AK129698
912	chr10+2855	chr10	17	AK128169
913	chr10+3108	chr10	17	AK126491
914	chr11+1540	chr11	17	AK091052
915	chr12+3931	chr12	17	AK123900
916	chr12+5248	chr12	17	AK130486
917	chr12+5615	chr12	17	AK125520
918	chr13+1450	chr13	17	AK027555
919	chr14+390	chr14	17	XM_370758.1
920	chr14+3610	chr14	17	AK001109
921	chr2+1525	chr2	17	AK123375
922	chr2+5390	chr2	17	AK097922
923	chr2+8451	chr2	17	AK098539
924	chr22+1170	chr22	17	AK057493
925	chr22+2053	chr22	17	AK092202
926	chr3+3158	chr3	17	AL832184.1
927	chr3+4321	chr3	17	AK098660
928	chr3+7597	chr3	17	AK094122
929	chr5+1672	chr5	17	AK094361
930	chr5+4945	chr5	17	AK091723
931	chr5+6210	chr5	17	AK124134
932	chr8+4795	chr8	17	AK027383
933	chr9+3011	chr9	17	AK123066
934	chrX+2340	chrX	17	BX537697.1
935	chr10-3157	chr10	17	AK055182
936	chr10-3852	chr10	17	AK056518
937	chr11-1560	chr11	17	AK022346
938	chr11-3162	chr11	17	AK057616
939	chr12-5700	chr12	17	AK093746
940	chr13-2413	chr13	17	AK093165
941	chr15-822	chr15	17	AK130329
942	chr15_random-42	chr15_random	17	AK125649
943	chr16-255	chr16	17	AK055320
944	chr16-2204	chr16	17	AK057076
945	chr17-109	chr17	17	AK098016
946	chr18-1153	chr18	17	AY762618.1
947	chr2-5138	chr2	17	AK090794
948	chr2-6568	chr2	17	AK123766
949	chr2-8459	chr2	17	AK096531
950	chr2-8832	chr2	17	AK123120
951	chr20-921	chr20	17	AK057198
952	chr22-1806	chr22	17	AK094432
953	chr3-7711	chr3	17	AK056892
954	chr5-3909	chr5	17	AK092482
955	chr6-3530	chr6	17	AL833240.1
956	chr6-4125	chr6	17	AK126413
957	chr6-5873	chr6	17	AK056826
958	chr6-6274	chr6	17	AK093518
959	chr8-2000	chr8	17	AK074272
960	chr8-2749	chr8	17	AK022971
961	chr17+39	chr17	16	X66358.1
962	chr4+2093	chr4	16	AB011149.1
963	chr1-2204	chr1	16	BX648806.1
964	chr22-2188	chr22	16	AF183411.1
965	chr7-1014	chr7	16	BC106048.1
966	chr7-6596	chr7	16	AK130822
967	chr9-318	chr9	16	AL834342.1
968	chr9_random-20	chr9_random	16	AL834342.1
969	chr2+4980	chr2	16	BX538202.1
970	chr20+18	chr20	16	AK022947
971	chr20-43	chr20	16	BC011481.1
972	chrX-1101	chrX	16	AK093652
973	chr5-4289	chr5	16	AK130705
974	chr1+4690	chr1	16	AK124503
975	chr1+4988	chr1	16	AK126296
976	chr1+6096	chr1	16	AK096651
977	chr1+10443	chr1	16	AK125357
978	chr10+1746	chr10	16	AK054825
979	chr10+4850	chr10	16	AK092127
980	chr11+1392	chr11	16	AK095453
981	chr11+3199	chr11	16	BX641058.1
982	chr12+1135	chr12	16	AK021937
983	chr13+1403	chr13	16	AK056507
984	chr13+2241	chr13	16	AL049452.1
985	chr14+340	chr14	16	AK056368
986	chr15+428	chr15	16	AK095096
987	chr15+3390	chr15	16	AK026477
988	chr17+2258	chr17	16	AK091224
989	chr19+1539	chr19	16	AK123904
990	chr19+2570	chr19	16	AK123333
991	chr20+379	chr20	16	AK097836
992	chr22+90	chr22	16	AK095590
993	chr4+4966	chr4	16	AK094909
994	chr5+3186	chr5	16	AK123949
995	chr9+1184	chr9	16	BC014254.2
996	chr9+5011	chr9	16	AK098241
997	chrX+1099	chrX	16	AK094441
998	chrX+1217	chrX	16	AK023038
999	chrX_random+34	chrX_random	16	AK090442.1
1000	chr1-6140	chr1	16	AK130581
1001	chr1-9532	chr1	16	AK054947
1002	chr10-1065	chr10	16	AK097854
1003	chr12-2855	chr12	16	AK128707
1004	chr14-789	chr14	16	AK095250
1005	chr14-1348	chr14	16	BX647685.1
1006	chr15-791	chr15	16	AK124797
1007	chr15-980	chr15	16	AK097782
1008	chr16-113	chr16	16	AK023887
1009	chr17-463	chr17	16	AK123869
1010	chr19-201	chr19	16	BX647249.1
1011	chr1_random-28	chr1_random	16	AK023588
1012	chr20-296	chr20	16	AK094347
1013	chr3-350	chr3	16	AK054628
1014	chr3-6304	chr3	16	AK057338
1015	chr4-5655	chr4	16	AK311638
1016	chr5-5229	chr5	16	AK096668
1017	chr6-5553	chr6	16	AK126168
1018	chr6_cox_hap1-246	chr6_cox_hap1	16	AL049252.1
1019	chr6_qbl_hap2-219	chr6_qbl_hap2	16	AL049252.1
1020	chr7-2523	chr7	16	AL832759.1
1021	chr8-5238	chr8	16	XM_379540.2
1022	chrX-380	chrX	16	AL831886.1
1023	chr1+2552	chr1	15	AL157461.1
1024	chr1+8172	chr1	15	AK026422
1025	chr14+3389	chr14	15	AK023714
1026	chr12-2565	chr12	15	BC004866.2
1027	chr15-3286	chr15	15	AL137436.1
1028	chr8-4288	chr8	15	BC031867.1
1029	chr14-509	chr14	15	AK131007
1030	chr3-5625	chr3	15	AK022015
1031	chr2+3307	chr2	15	AL157503.1
1032	chr15-615	chr15	15	AK090766
1033	chr8-920	chr8	15	AK095104
1034	chr1+6307	chr1	15	AK023642
1035	chr1+7748	chr1	15	AK092254
1036	chr10+1982	chr10	15	AK093055
1037	chr10+2557	chr10	15	AL080082.1
1038	chr11+48	chr11	15	AK095144
1039	chr11+2795	chr11	15	AK127930
1040	chr12+643	chr12	15	AK126248
1041	chr14+1258	chr14	15	AK022117
1042	chr14+2261	chr14	15	AK023718
1043	chr15+3531	chr15	15	AK096897
1044	chr15+3543	chr15	15	AK097486
1045	chr16+1622	chr16	15	AK022200
1046	chr17+1077	chr17	15	AK091208
1047	chr17+2185	chr17	15	AK093715
1048	chr19+2339	chr19	15	AK023756
1049	chr2+768	chr2	15	AK127070
1050	chr2+1973	chr2	15	AK023940
1051	chr2+3143	chr2	15	AK125051
1052	chr2+9446	chr2	15	AK022132
1053	chr22+2030	chr22	15	AK091355
1054	chr2_random+12	chr2_random	15	AK022132
1055	chr4+1349	chr4	15	AK056558
1056	chr5+2233	chr5	15	AK124552
1057	chr5+4809	chr5	15	AK092349
1058	chr6+3363	chr6	15	AK124658
1059	chr6+5850	chr6	15	BX537662.1
1060	chr7+1015	chr7	15	AK124471
1061	chr7+1704	chr7	15	AK096266
1062	chr7+5089	chr7	15	AK130615
1063	chr9+708	chr9	15	BX648133.1
1064	chr9+897	chr9	15	AK055810
1065	chrX+3148	chrX	15	AK057819
1066	chrX+3288	chrX	15	AK095886
1067	chrX_random+25	chrX_random	15	AK055676
1068	chrX_random+36	chrX_random	15	AK055676
1069	chr1-6460	chr1	15	AK075186
1070	chr12-1612	chr12	15	AK126526
1071	chr13-2362	chr13	15	AK094967
1072	chr14-2348	chr14	15	AK096674
1073	chr14-3462	chr14	15	AK125397
1074	chr15-391	chr15	15	AK093148
1075	chr15-3224	chr15	15	AK123438
1076	chr15-3859	chr15	15	AK021616
1077	chr17-173	chr17	15	AL162045.1
1078	chr18-1504	chr18	15	AK124319
1079	chr19-1029	chr19	15	AK091414
1080	chr2-1128	chr2	15	AK124897
1081	chr2-6164	chr2	15	AK126244
1082	chr2-6687	chr2	15	AK124032
1083	chr2-9065	chr2	15	AK094521
1084	chr21-183	chr21	15	AK096268
1085	chr3-3051	chr3	15	AK092468
1086	chr3-7734	chr3	15	AL832729.1
1087	chr4-2551	chr4	15	AK126709
1088	chr4-4905	chr4	15	AK094546
1089	chr5-3337	chr5	15	AK091866
1090	chr5-5219	chr5	15	AK023508
1091	chr5-6590	chr5	15	AK126844
1092	chr5_h2_hap1-179	chr5_h2_hap1	15	AK124552
1093	chr7-418	chr7	15	AK096225
1094	chr7-1398	chr7	15	AK055108
1095	chr7-3037	chr7	15	AK094892
1096	chr9-2234	chr9	15	AK092145
1097	chrX-1521	chrX	15	AK125301
1098	chrX-3064	chrX	15	AK055676
1099	chr16+245	chr16	14	XM_496111.1
1100	chr8+1273	chr8	14	BC015784.1
1101	chr10-2002	chr10	14	AK095515
1102	chr4-1597	chr4	14	BX648831.1
1103	chr5-2142	chr5	14	AK126749
1104	chr8+1352	chr8	14	AK025893
1105	chr1+5647	chr1	14	AK123765
1106	chr1+6633	chr1	14	AK307246
1107	chr10+1166	chr10	14	AK123440
1108	chr13+796	chr13	14	AK095147
1109	chr13+1971	chr13	14	AK002196
1110	chr15+1234	chr15	14	AK094950
1111	chr16+1079	chr16	14	AK125313
1112	chr17+724	chr17	14	AK091139
1113	chr2+764	chr2	14	AK128334
1114	chr20+350	chr20	14	AK022738
1115	chr22+1389	chr22	14	AK026327
1116	chr22+2116	chr22	14	AK093107
1117	chr3+5425	chr3	14	AK128702
1118	chr4+900	chr4	14	AK125392
1119	chr4+1625	chr4	14	AK094991
1120	chr4+1771	chr4	14	AK055055
1121	chr4+5091	chr4	14	AK092578
1122	chr5+2102	chr5	14	AK124552
1123	chr5+4382	chr5	14	AK092789
1124	chr6+1701	chr6	14	AL117529.1
1125	chr6+3073	chr6	14	BX647670.1
1126	chr7+3904	chr7	14	AK096529
1127	chr8+2535	chr8	14	AK097273
1128	chr9+445	chr9	14	AK094342
1129	chrX+502	chrX	14	AK094443
1130	chr1-3293	chr1	14	AK097492
1131	chr1-5788	chr1	14	AK097502
1132	chr1-7121	chr1	14	AK094638
1133	chr1-7555	chr1	14	AK097931
1134	chr10-5198	chr10	14	AK056703
1135	chr11-1891	chr11	14	AK129753
1136	chr11-5688	chr11	14	AK095535
1137	chr12-5831	chr12	14	AL833464.1
1138	chr13-492	chr13	14	AK095102
1139	chr13-2535	chr13	14	AK307165
1140	chr15-1584	chr15	14	AK056793
1141	chr16-1669	chr16	14	AL117580.1
1142	chr17-1698	chr17	14	AK054819
1143	chr17-2131	chr17	14	AK074603
1144	chr17-2392	chr17	14	AK022223
1145	chr17-2937	chr17	14	AK095097
1146	chr17-4287	chr17	14	AK123100
1147	chr18-297	chr18	14	BX648957.1
1148	chr19-708	chr19	14	AK092213
1149	chr19-3396	chr19	14	AK097879
1150	chr20-1536	chr20	14	AK128879
1151	chr20-1879	chr20	14	AK126952
1152	chr20-2268	chr20	14	AK124961
1153	chr22-905	chr22	14	AK097787
1154	chr22-1824	chr22	14	AK026838
1155	chr3-7765	chr3	14	AK095224
1156	chr5-5272	chr5	14	AK075204
1157	chr6-1803	chr6	14	AK127472
1158	chr6-1869	chr6	14	AL713649.2
1159	chr6-4936	chr6	14	AK126421
1160	chr6-6460	chr6	14	AK000788
1161	chr8-795	chr8	14	BX648371.1
1162	chr8-1954	chr8	14	AK093190
1163	chr9-2120	chr9	14	AL833510.1
1164	chr9-2696	chr9	14	AK094726
1165	chr9-4805	chr9	14	AK022095
1166	chr10+2449	chr10	13	M62895.1
1167	chr10+4696	chr10	13	AL832656.1
1168	chr4+1559	chr4	13	AK098597
1169	chr4+2104	chr4	13	XM_498969.1
1170	chr19-3685	chr19	13	AK025573
1171	chr11+5394	chr11	13	AK126294
1172	chr1-5957	chr1	13	AK000394
1173	chr6+5257	chr6	13	AK096129
1174	chr2-7202	chr2	13	AK057710
1175	chr1+75	chr1	13	AK056486
1176	chr1+654	chr1	13	AK055171
1177	chr1+921	chr1	13	AK074598
1178	chr1+2895	chr1	13	AK097731
1179	chr1+5522	chr1	13	AK123199
1180	chr1+7347	chr1	13	AK055280
1181	chr1+7523	chr1	13	AK024541
1182	chr10+575	chr10	13	AK056870
1183	chr10+4451	chr10	13	AK056784
1184	chr11+1361	chr11	13	AK027139
1185	chr12+1324	chr12	13	AK094733
1186	chr12+2996	chr12	13	AL137354.1
1187	chr13+2990	chr13	13	AK092053
1188	chr14+1292	chr14	13	AK091776
1189	chr14+2994	chr14	13	AK056249
1190	chr15+153	chr15	13	AK058147
1191	chr16+4278	chr16	13	AK127827
1192	chr19+1766	chr19	13	AK055100
1193	chr2+186	chr2	13	AK093290
1194	chr2+4127	chr2	13	AK056547
1195	chr2+7564	chr2	13	AY245868.1
1196	chr2+7609	chr2	13	AK124664
1197	chr2+8037	chr2	13	AK123349
1198	chr5+215	chr5	13	AK021714
1199	chr5+3974	chr5	13	AK001007
1200	chr6+2251	chr6	13	AK124352
1201	chr7+899	chr7	13	AK057873
1202	chr7+1142	chr7	13	AK124888
1203	chr7+1353	chr7	13	AK092714
1204	chr7+6650	chr7	13	AK123979
1205	chr8+2166	chr8	13	AK092144
1206	chr9+4196	chr9	13	AL049986.1
1207	chr9+5210	chr9	13	AK095845
1208	chrX+1394	chrX	13	AK091532
1209	chr1-4622	chr1	13	AK091688
1210	chr10-61	chr10	13	AK095503
1211	chr10-1873	chr10	13	AK124121
1212	chr10-4303	chr10	13	AK125312
1213	chr10-4839	chr10	13	AK123677
1214	chr11-69	chr11	13	AK097142
1215	chr11-1130	chr11	13	AK096925
1216	chr11-4483	chr11	13	AK095844
1217	chr12-2438	chr12	13	AK027848
1218	chr12-4386	chr12	13	AK055543
1219	chr14-61	chr14	13	AK123017
1220	chr14-852	chr14	13	AK126785
1221	chr15-2736	chr15	13	AK023571
1222	chr15-3027	chr15	13	AK090738
1223	chr19-1188	chr19	13	AK090553
1224	chr19-2102	chr19	13	AK125686
1225	chr2-2068	chr2	13	AK022231
1226	chr2-5126	chr2	13	AK095498
1227	chr2-7807	chr2	13	AK090686
1228	chr21-27	chr21	13	AK127572
1229	chr21-572	chr21	13	AK123880
1230	chr22-133	chr22	13	AK057312
1231	chr22-582	chr22	13	AK057177
1232	chr3-1729	chr3	13	AK311218
1233	chr3-4716	chr3	13	AK022443
1234	chr3-5900	chr3	13	AL162034.1
1235	chr4-202	chr4	13	AK057428
1236	chr5-1395	chr5	13	AK125371
1237	chr6-6505	chr6	13	AK092822
1238	chr7-4616	chr7	13	AK123474
1239	chr7-4857	chr7	13	AK097526
1240	chr8-3803	chr8	13	AK056395
1241	chr1+5147	chr1	12	AK130480
1242	chr14+1645	chr14	12	AK128843
1243	chr2+4772	chr2	12	AL832168.1
1244	chr3+357	chr3	12	AF280797.2
1245	chr3+2075	chr3	12	AK074312
1246	chr22-1332	chr22	12	AB051445.1
1247	chr3-6894	chr3	12	AK131021
1248	chr4-3713	chr4	12	XM_373027.2
1249	chr9-4384	chr9	12	BX538226.1
1250	chr10+3246	chr10	12	AK022598
1251	chr5-4298	chr5	12	AK130705
1252	chr1+1003	chr1	12	AK123071
1253	chr1+6831	chr1	12	AK021924
1254	chr1+8808	chr1	12	AK022893
1255	chr1+9919	chr1	12	AK023086
1256	chr1+10473	chr1	12	AK022422
1257	chr11+467	chr11	12	AK022556
1258	chr11+4155	chr11	12	AK097805
1259	chr12+1326	chr12	12	AK058180
1260	chr13+928	chr13	12	AK056182
1261	chr13+2838	chr13	12	AK093579
1262	chr14+3437	chr14	12	BX537551.1
1263	chr16+819	chr16	12	AK124470
1264	chr16+2360	chr16	12	AK128747
1265	chr17+3905	chr17	12	AB026156.1
1266	chr18+330	chr18	12	AK021763
1267	chr19+3068	chr19	12	AK125548
1268	chr19+3614	chr19	12	AK097675
1269	chr2+4119	chr2	12	AK096487
1270	chr2+4612	chr2	12	AK092780
1271	chr2+8067	chr2	12	AK093026
1272	chr2+8377	chr2	12	AK093901
1273	chr2+8653	chr2	12	AK127274
1274	chr20+2161	chr20	12	AK126019
1275	chr21+666	chr21	12	AK124146
1276	chr21+722	chr21	12	AK025786
1277	chr3+630	chr3	12	AK022645
1278	chr3+4985	chr3	12	AK023635
1279	chr4+3270	chr4	12	AK127031
1280	chr4+4482	chr4	12	AK123439
1281	chr5+5372	chr5	12	AK090581
1282	chr5+5509	chr5	12	AK123543
1283	chr7+794	chr7	12	AK095064
1284	chr7+2008	chr7	12	AL137474.1
1285	chr8+433	chr8	12	AK054783
1286	chr8+584	chr8	12	AK092531
1287	chr8+2121	chr8	12	AK090741
1288	chr8+2630	chr8	12	AK091686
1289	chr8+2784	chr8	12	BX641068.1
1290	chr9+3989	chr9	12	AL832764.1
1291	chrX+625	chrX	12	AK126657
1292	chrX+2127	chrX	12	AK124135
1293	chr1-619	chr1	12	AK093547
1294	chr1-1973	chr1	12	AK091338
1295	chr1-3442	chr1	12	AK093132
1296	chr1-4723	chr1	12	AK124487
1297	chr1-8606	chr1	12	AK091566
1298	chr10-3616	chr10	12	AK093071
1299	chr13-1715	chr13	12	AK123146
1300	chr14-2702	chr14	12	AK055143
1301	chr15-1973	chr15	12	AK124188
1302	chr15-2315	chr15	12	AK023404
1303	chr16-2382	chr16	12	AK075019
1304	chr16-3384	chr16	12	AK093856
1305	chr17-2674	chr17	12	AK025003
1306	chr18-1901	chr18	12	AK074657
1307	chr19-966	chr19	12	AK055324
1308	chr2-57	chr2	12	AK124871
1309	chr2-2073	chr2	12	AK123493
1310	chr2-4032	chr2	12	AK056055
1311	chr2-5013	chr2	12	AK097754
1312	chr2-8703	chr2	12	AK123475
1313	chr2-9169	chr2	12	AK307324
1314	chr20-1528	chr20	12	AK125612
1315	chr22-59	chr22	12	AK307115
1316	chr3-2121	chr3	12	AL110176.1
1317	chr3-2581	chr3	12	AL133099.1
1318	chr3-3115	chr3	12	AK057074
1319	chr3-4641	chr3	12	AK025793
1320	chr3-4830	chr3	12	AK097164
1321	chr3-6905	chr3	12	AK022264
1322	chr4-1909	chr4	12	AK026485
1323	chr4-2053	chr4	12	AK123461
1324	chr4-2774	chr4	12	AK023526
1325	chr4-5183	chr4	12	AK025887
1326	chr5-4139	chr5	12	AK123868
1327	chr5-4486	chr5	12	AK130675
1328	chr6-1245	chr6	12	AK092592
1329	chr7-258	chr7	12	AK127966
1330	chr7-1644	chr7	12	BX537723.1
1331	chr7-2524	chr7	12	AK095743
1332	chr7-2698	chr7	12	AK093437
1333	chr7-5439	chr7	12	AK027340
1334	chr7-6282	chr7	12	AK092608
1335	chr8-1706	chr8	12	AK092647
1336	chr1+2416	chr1	11	AK024440.1
1337	chr1+8894	chr1	11	AL050068.1
1338	chr10+4036	chr10	11	BC021189.2
1339	chr11+2643	chr11	11	XM_370634.2
1340	chr3+6740	chr3	11	AK129874
1341	chr6+2689	chr6	11	AK024927
1342	chr7+1767	chr7	11	AK024861
1343	chr12-65	chr12	11	BC009836.1
1344	chr19-1834	chr19	11	AY007087.1
1345	chr21-1352	chr21	11	BX648100.1
1346	chr4-903	chr4	11	M62896.1
1347	chr7-1305	chr7	11	BX648653.1
1348	chr8-1171	chr8	11	AK025288
1349	chr16+2413	chr16	11	AL161979.1
1350	chr3+1713	chr3	11	AK127399
1351	chr12-916	chr12	11	AK074371
1352	chr2-78	chr2	11	AK124250
1353	chr7-2098	chr7	11	AK093797
1354	chr1+460	chr1	11	AK310503
1355	chr1+2305	chr1	11	AK093261
1356	chr1+8875	chr1	11	AK127212
1357	chr1+9066	chr1	11	BC009873.2
1358	chr10+1341	chr10	11	AK092850
1359	chr10+3400	chr10	11	AK097655
1360	chr11+3014	chr11	11	AK094674
1361	chr11+5180	chr11	11	AL833383.1
1362	chr12+279	chr12	11	AK090724
1363	chr12+722	chr12	11	AK096314
1364	chr12+903	chr12	11	AK024522
1365	chr12+1722	chr12	11	AK056007
1366	chr12+3756	chr12	11	AK021875
1367	chr14+438	chr14	11	AK129947
1368	chr14+2976	chr14	11	AL832767.1
1369	chr17+2223	chr17	11	AK096059
1370	chr17+4376	chr17	11	AK095403
1371	chr17+4688	chr17	11	AK096234
1372	chr19+1548	chr19	11	AK128466
1373	chr19+1853	chr19	11	AK127276
1374	chr19+3251	chr19	11	AK090493
1375	chr2+110	chr2	11	AK094194
1376	chr2+2325	chr2	11	AK094622
1377	chr2+6295	chr2	11	AK123487
1378	chr20+1275	chr20	11	AK097865
1379	chr20+1778	chr20	11	BC015320.1
1380	chr3+2319	chr3	11	AK125074
1381	chr4+1627	chr4	11	AK094850
1382	chr4+5787	chr4	11	AK095968
1383	chr5+2253	chr5	11	AK124552
1384	chr5+3727	chr5	11	AK128648
1385	chr5+5033	chr5	11	AK027578
1386	chr6+1528	chr6	11	BX648392.1
1387	chr6+5638	chr6	11	AK093761
1388	chr6_cox_hap1+231	chr6_cox_hap1	11	BX648392.1
1389	chr8+967	chr8	11	AK124295
1390	chr9+1030	chr9	11	AK094813
1391	chr9+1202	chr9	11	AK056723
1392	chr9+3067	chr9	11	AK023687
1393	chrX+1740	chrX	11	AK093935
1394	chr1-1714	chr1	11	AK022798
1395	chr1-3073	chr1	11	AK127238
1396	chr1-6794	chr1	11	AK094803
1397	chr1-7425	chr1	11	AK023883
1398	chr10-248	chr10	11	AK024385
1399	chr10-3563	chr10	11	AK023559
1400	chr11-2493	chr11	11	BX648162.1
1401	chr11-3074	chr11	11	AK125412
1402	chr12-955	chr12	11	AK094902
1403	chr13-146	chr13	11	AK093292
1404	chr15-4184	chr15	11	AK124131
1405	chr16-1101	chr16	11	AK096066
1406	chr16-2041	chr16	11	AK128166
1407	chr17-4029	chr17	11	AK096528
1408	chr17-4800	chr17	11	AK093870
1409	chr18-1260	chr18	11	AK097450
1410	chr19-3202	chr19	11	AK055767
1411	chr2-4016	chr2	11	AK027270
1412	chr2-6624	chr2	11	AK126800
1413	chr2-7624	chr2	11	AK023819
1414	chr2-8782	chr2	11	S49953.1
1415	chr22-1676	chr22	11	AK091970
1416	chr3-3976	chr3	11	AK091114
1417	chr4-578	chr4	11	AK021441
1418	chr4-1209	chr4	11	BC035666.1
1419	chr4-1295	chr4	11	AK307172
1420	chr4-5534	chr4	11	AK094757
1421	chr5-1025	chr5	11	AK095428
1422	chr5-3000	chr5	11	AK092078
1423	chr5-3095	chr5	11	AK094985
1424	chr5-3498	chr5	11	AK054805
1425	chr5-3676	chr5	11	AK130230
1426	chr5-6089	chr5	11	AK123396
1427	chr5-6493	chr5	11	AK091791
1428	chr6-1255	chr6	11	AK130976
1429	chr6-1522	chr6	11	AK093513
1430	chr6-6166	chr6	11	AK096731
1431	chr7-2036	chr7	11	AK055497
1432	chr7-2333	chr7	11	AK124371
1433	chr7_random-20	chr7_random	11	AK094159
1434	chr8-2575	chr8	11	AK001012
1435	chr8-2933	chr8	11	AK094960
1436	chr8-3083	chr8	11	AK124262
1437	chr8-3897	chr8	11	AK091440
1438	chr8-3942	chr8	11	BC014230.2
1439	chr9-1998	chr9	11	AK090966
1440	chr9-4740	chr9	11	AK054690
1441	chr13+2677	chr13	10	AK098538
1442	chr16+3282	chr16	10	AK122592.1
1443	chr6+2209	chr6	10	BX649034.1
1444	chr7+2470	chr7	10	AL833452.1
1445	chr1-2820	chr1	10	BC004969.1
1446	chr12-2071	chr12	10	AK130911
1447	chr10+2999	chr10	10	AK130741
1448	chr3+2777	chr3	10	AK310033
1449	chr1+1114	chr1	10	AK094779
1450	chr1+7454	chr1	10	AK097234
1451	chr1+7601	chr1	10	BC001841.2
1452	chr1+9020	chr1	10	BC000988.2
1453	chr1+10242	chr1	10	AK091068
1454	chr10+292	chr10	10	AK094154
1455	chr10+422	chr10	10	AK092945
1456	chr10+454	chr10	10	AK124163
1457	chr10+970	chr10	10	AK127302
1458	chr10+4317	chr10	10	AK023761
1459	chr11+1657	chr11	10	AK093532
1460	chr12+3458	chr12	10	AK093193
1461	chr12+3481	chr12	10	AK074510
1462	chr12+4531	chr12	10	AK021744
1463	chr12+5357	chr12	10	AK096174
1464	chr13+157	chr13	10	AK054845
1465	chr13+965	chr13	10	AK092199
1466	chr13+1173	chr13	10	AK092086
1467	chr13+2030	chr13	10	AK021689
1468	chr14+1633	chr14	10	AK097185
1469	chr15+2690	chr15	10	AK097988
1470	chr15+2712	chr15	10	AK127230
1471	chr15+3874	chr15	10	AK094352
1472	chr16+2071	chr16	10	AK056973
1473	chr16+2627	chr16	10	AK125407
1474	chr17+3858	chr17	10	AK130672
1475	chr17+4654	chr17	10	AK124905
1476	chr19+3751	chr19	10	AK054806
1477	chr2+7539	chr2	10	AK021816
1478	chr2+8539	chr2	10	AK092217
1479	chr2+9114	chr2	10	AK000798
1480	chr20+109	chr20	10	AK075122
1481	chr20+1358	chr20	10	AK021595
1482	chr20+1774	chr20	10	AK023614
1483	chr3+3948	chr3	10	AK093088
1484	chr4+477	chr4	10	AK023294
1485	chr4+2552	chr4	10	AK123913
1486	chr4+3448	chr4	10	AK094561
1487	chr4+4954	chr4	10	AK129723
1488	chr5+206	chr5	10	AK094509
1489	chr5+5089	chr5	10	AK056780
1490	chr6+2058	chr6	10	AK091649
1491	chr6+4554	chr6	10	AK055705
1492	chr7+2093	chr7	10	AK022370
1493	chr7+2264	chr7	10	AK123141
1494	chr7+4218	chr7	10	AK098134
1495	chr7+6244	chr7	10	AL162052.1
1496	chr8+438	chr8	10	AK055360
1497	chr8+1850	chr8	10	AK021745
1498	chr9+2497	chr9	10	BX647080.1
1499	chr9+3138	chr9	10	BC008050.2
1500	chr9+3700	chr9	10	AK095133
1501	chr9+5096	chr9	10	AK092751
1502	chrX+903	chrX	10	AK123758
1503	chrX+1191	chrX	10	AK055522
1504	chrX_random+57	chrX_random	10	AK096667
1505	chrY+125	chrY	10	AK124410
1506	chr1-2977	chr1	10	AK022076
1507	chr1-4966	chr1	10	AK123168
1508	chr1-5923	chr1	10	AK090700
1509	chr1-9523	chr1	10	AK021935
1510	chr10-1536	chr10	10	AK090649
1511	chr10-2612	chr10	10	AK055524
1512	chr10-3834	chr10	10	AK057413
1513	chr10-4904	chr10	10	AK092036
1514	chr11-1504	chr11	10	AK124326
1515	chr11-4085	chr11	10	AK097541
1516	chr11-5554	chr11	10	AK123073
1517	chr12-666	chr12	10	BC011943.2
1518	chr15-2008	chr15	10	AK125516
1519	chr15-2390	chr15	10	AK095426
1520	chr17-2105	chr17	10	AK093429
1521	chr2-1973	chr2	10	AK098043
1522	chr2-2558	chr2	10	AK128852
1523	chr2-2930	chr2	10	AK023515
1524	chr2-5252	chr2	10	AK093543
1525	chr2-6644	chr2	10	AK055581
1526	chr20-848	chr20	10	AK097925
1527	chr21-738	chr21	10	AK091167
1528	chr22-528	chr22	10	AK096917
1529	chr22-900	chr22	10	AK055475
1530	chr22-931	chr22	10	AK075161
1531	chr22-1173	chr22	10	AL049348.1
1532	chr4-482	chr4	10	AK091103
1533	chr4-2132	chr4	10	AK058136
1534	chr5-106	chr5	10	AK090555
1535	chr5-1293	chr5	10	AK054753
1536	chr5-6393	chr5	10	AK094462
1537	chr6-524	chr6	10	AK022362
1538	chr6-721	chr6	10	AK124909
1539	chr6_cox_hap1-174	chr6_cox_hap1	10	AK095029
1540	chr7-2421	chr7	10	AK126439
1541	chr7-5125	chr7	10	AK096766
1542	chr9-229	chr9	10	AK096249
1543	chr9-2129	chr9	10	AK091930
1544	chr9-2515	chr9	10	AK128201
1545	chr9-3946	chr9	10	AK092660
1546	chr1+6944	chr1	9	AL096734.1
1547	chr10+3546	chr10	9	BC031631.1
1548	chr12+5013	chr12	9	BX647268.1
1549	chr13+186	chr13	9	AL833146.1
1550	chr14+381	chr14	9	BX538073.1
1551	chr17+4927	chr17	9	AL832593.1
1552	chr19+3248	chr19	9	AK025419
1553	chr2+8113	chr2	9	AF090897.1
1554	chr13-634	chr13	9	AK026896
1555	chr13-1290	chr13	9	AK026981
1556	chr16-583	chr16	9	AK098656
1557	chr17-4061	chr17	9	BX647090.1
1558	chr5-1009	chr5	9	U28727.1
1559	chr6-5497	chr6	9	AL110159.1
1560	chr8-1573	chr8	9	BC029562.1
1561	chr8-1700	chr8	9	AK098572
1562	chr14+3984	chr14	9	AK058096
1563	chr8+3082	chr8	9	AK093080
1564	chrX-1241	chrX	9	AK091722
1565	chr14+1552	chr14	9	AL833129.1
1566	chr1+3202	chr1	9	AK097571
1567	chr1+6027	chr1	9	AK023270
1568	chr1+9685	chr1	9	AK094348
1569	chr1+9974	chr1	9	AK124056
1570	chr10+106	chr10	9	AK097545
1571	chr10+233	chr10	9	AK125014
1572	chr10+980	chr10	9	AK094582
1573	chr10+1655	chr10	9	AL833559.1
1574	chr10+2998	chr10	9	AK091983
1575	chr11+3091	chr11	9	AK097446
1576	chr12+2540	chr12	9	AK027179
1577	chr12+4581	chr12	9	AK092411
1578	chr12+5001	chr12	9	AK054946
1579	chr14+43	chr14	9	AK056884
1580	chr14+2394	chr14	9	AK055876
1581	chr14+3653	chr14	9	AK093673
1582	chr15+1374	chr15	9	AL122040.1
1583	chr15+3378	chr15	9	AK311032
1584	chr15+3851	chr15	9	AK128647
1585	chr17+1173	chr17	9	AK130829
1586	chr17+4440	chr17	9	AK097103
1587	chr17+4678	chr17	9	AK093770
1588	chr18+335	chr18	9	AK094436
1589	chr18+2371	chr18	9	AK094957
1590	chr19+902	chr19	9	AK093694
1591	chr19+1925	chr19	9	AK097939
1592	chr2+1255	chr2	9	AK095182
1593	chr2+1526	chr2	9	AK094554
1594	chr2+1954	chr2	9	AK023264
1595	chr2+5123	chr2	9	AL136789.1
1596	chr2+6539	chr2	9	AK022236
1597	chr2+7112	chr2	9	AK021459
1598	chr2+8283	chr2	9	AK123804
1599	chr2+9210	chr2	9	AK023938
1600	chr20+175	chr20	9	AK097516
1601	chr20+720	chr20	9	AK023872
1602	chr20+2157	chr20	9	AL832259.1
1603	chr22+284	chr22	9	AK057137
1604	chr3+382	chr3	9	AK055416
1605	chr3+449	chr3	9	AK093700
1606	chr3+647	chr3	9	AK094334
1607	chr3+4300	chr3	9	AK092902
1608	chr3+5689	chr3	9	AK096143
1609	chr3+5705	chr3	9	AK097380
1610	chr3+6000	chr3	9	AK093778
1611	chr3+7722	chr3	9	AK124973
1612	chr5+232	chr5	9	BC029465.1
1613	chr5+613	chr5	9	AK093362
1614	chr5+717	chr5	9	AK098570
1615	chr6+379	chr6	9	AK022442
1616	chr6+3301	chr6	9	BX640688.1
1617	chr6+6206	chr6	9	AK096733
1618	chr7+235	chr7	9	AK123586
1619	chr7+422	chr7	9	AK094662
1620	chr7+667	chr7	9	AK057668
1621	chr7+1017	chr7	9	BX537871.1
1622	chr7+1051	chr7	9	AK093987
1623	chr7+2074	chr7	9	AK000106
1624	chr7+2096	chr7	9	AK024321
1625	chr8+196	chr8	9	AK057995
1626	chr8+418	chr8	9	AK054759
1627	chr8+657	chr8	9	AK022085
1628	chr8+860	chr8	9	AK057515
1629	chr8+1811	chr8	9	AK090892
1630	chr8+2735	chr8	9	AK124684
1631	chr9+1758	chr9	9	AK094831
1632	chr9+1864	chr9	9	AK123756
1633	chr9+2629	chr9	9	AK025086
1634	chr9+2960	chr9	9	AK096349
1635	chr9+3563	chr9	9	AK093363
1636	chr9+5181	chr9	9	AK098664
1637	chrX+1089	chrX	9	BC069772.1
1638	chrX+1157	chrX	9	AK123627
1639	chr1-3344	chr1	9	AK123984
1640	chr1-4689	chr1	9	AK091693
1641	chr1-6537	chr1	9	AK097722
1642	chr1-9223	chr1	9	AK096079
1643	chr1-10410	chr1	9	AK096384
1644	chr10-5094	chr10	9	AK023770
1645	chr10-5557	chr10	9	AK094373
1646	chr11-149	chr11	9	AK128059
1647	chr12-804	chr12	9	AK056762
1648	chr12-957	chr12	9	AK021554
1649	chr12-1273	chr12	9	AK093423
1650	chr12-5006	chr12	9	AK125440
1651	chr12-5668	chr12	9	AK056228
1652	chr13-606	chr13	9	AK021630
1653	chr13-2119	chr13	9	BX649149.1
1654	chr13-2232	chr13	9	AK023568
1655	chr14-2660	chr14	9	AK092589
1656	chr14-3621	chr14	9	AK056884
1657	chr15-4	chr15	9	BC048429.1
1658	chr15-997	chr15	9	AK094053
1659	chr15-1355	chr15	9	AK124841
1660	chr16-543	chr16	9	AK024241
1661	chr16-2490	chr16	9	AK093371
1662	chr17-543	chr17	9	AK054865
1663	chr17-3724	chr17	9	AK125757
1664	chr17-3755	chr17	9	AK098724
1665	chr18-1479	chr18	9	AK127888
1666	chr19-462	chr19	9	AK098776
1667	chr19-1802	chr19	9	AL137752.1
1668	chr2-866	chr2	9	AK090760
1669	chr2-5871	chr2	9	AK092857
1670	chr2-6409	chr2	9	AK024108
1671	chr2-7216	chr2	9	AK022084
1672	chr2-8620	chr2	9	AK125124
1673	chr20-185	chr20	9	AK125931
1674	chr20-1860	chr20	9	AK055550
1675	chr22-83	chr22	9	AK022892
1676	chr3-1127	chr3	9	AK022268
1677	chr3-5665	chr3	9	AK093347
1678	chr3-6134	chr3	9	AK092973
1679	chr4-201	chr4	9	AK096134
1680	chr4-446	chr4	9	AK125257
1681	chr4-1523	chr4	9	AK093674
1682	chr4-2433	chr4	9	AK124002
1683	chr4-4022	chr4	9	AK096470
1684	chr5-3677	chr5	9	AK092171
1685	chr5-6368	chr5	9	AK023122
1686	chr6-2588	chr6	9	AK124914
1687	chr6-5327	chr6	9	AK097539
1688	chr6-5631	chr6	9	AK092541
1689	chr6-5769	chr6	9	AK021743
1690	chr7-5832	chr7	9	AK054880
1691	chr8-883	chr8	9	AK022434
1692	chr8-2764	chr8	9	AK055514
1693	chr8-2970	chr8	9	AK093370
1694	chr8-5180	chr8	9	AK093412
1695	chr9-2034	chr9	9	AK021556
1696	chr9-2890	chr9	9	AK127685
1697	chr9-3607	chr9	9	AK094831
1698	chr15+2352	chr15	8	AK129712
1699	chr16+2246	chr16	8	AK129756
1700	chr19+2955	chr19	8	BC000986.2
1701	chr2+942	chr2	8	AL136898.1
1702	chr2+4095	chr2	8	AK130869
1703	chr3+6589	chr3	8	AK025004
1704	chr1-179	chr1	8	AK058026
1705	chr10-1783	chr10	8	AK098548
1706	chr11-714	chr11	8	BC006134.1
1707	chr2-202	chr2	8	BC008026.1
1708	chr2-1628	chr2	8	XM_376165.2
1709	chr8-249	chr8	8	AK026750
1710	chr19+2623	chr19	8	BC015776.1
1711	chr10-4098	chr10	8	AL137671.1
1712	chr13-2077	chr13	8	AK022351
1713	chr22-1339	chr22	8	AB051443.1
1714	chr6-5102	chr6	8	AL049252.1
1715	chr1+3502	chr1	8	AK021674
1716	chr1+5436	chr1	8	AK093528
1717	chr1+5475	chr1	8	AK125210
1718	chr1+7401	chr1	8	AK124372
1719	chr1+9118	chr1	8	AK090497
1720	chr10+154	chr10	8	AK095699
1721	chr10+392	chr10	8	AK091810
1722	chr10+4714	chr10	8	AK090998
1723	chr11+1114	chr11	8	AK022031
1724	chr11+2784	chr11	8	AK022244
1725	chr11+4966	chr11	8	AK094004
1726	chr11+5208	chr11	8	AK021942
1727	chr13+2163	chr13	8	AK021505
1728	chr14+1700	chr14	8	AK055008
1729	chr14+3099	chr14	8	AK093266
1730	chr14+3975	chr14	8	AK126233
1731	chr15+763	chr15	8	AL137606.1
1732	chr15+939	chr15	8	AK022388
1733	chr15+1988	chr15	8	AK125802
1734	chr15+3765	chr15	8	AK055351
1735	chr16+85	chr16	8	AK090463.1
1736	chr16+1775	chr16	8	AK025061
1737	chr16+2707	chr16	8	AK092771
1738	chr16+3021	chr16	8	AK126271
1739	chr16+3132	chr16	8	AK022467
1740	chr17+44	chr17	8	AK093801
1741	chr17+2734	chr17	8	AK091529
1742	chr18+2037	chr18	8	AK022381
1743	chr19+726	chr19	8	AK127757
1744	chr19+1628	chr19	8	BX537835.1
1745	chr19+3325	chr19	8	AK093799
1746	chr19+3473	chr19	8	AK055464
1747	chr19+3506	chr19	8	AK127814
1748	chr2+918	chr2	8	AK098715
1749	chr2+1112	chr2	8	AK123934
1750	chr2+3128	chr2	8	AK056397
1751	chr2+4955	chr2	8	AK124216
1752	chr2+7858	chr2	8	AK091305
1753	chr2+8493	chr2	8	AK094001
1754	chr20+1273	chr20	8	AK095613
1755	chr20+1576	chr20	8	AK057672
1756	chr22_random+9	chr22_random	8	BC057848.1
1757	chr3+1248	chr3	8	AK021606
1758	chr3+3160	chr3	8	AK057196
1759	chr3+4015	chr3	8	AK097806
1760	chr3+7690	chr3	8	AK094115
1761	chr4+25	chr4	8	AK098259
1762	chr4+965	chr4	8	AK124473
1763	chr4+2118	chr4	8	AK124272
1764	chr4+2990	chr4	8	AK023519
1765	chr4+3158	chr4	8	AL833286.1
1766	chr5+1648	chr5	8	AK095768
1767	chr5+2240	chr5	8	AK125084
1768	chr5+3305	chr5	8	AK055485
1769	chr5+4714	chr5	8	AF329369.1
1770	chr5+5296	chr5	8	AK001582
1771	chr5+6189	chr5	8	AK125417
1772	chr6+2603	chr6	8	AK056855
1773	chr6+3463	chr6	8	AK022079
1774	chr6+6416	chr6	8	AK054948
1775	chr6_cox_hap1+189	chr6_cox_hap1	8	AK095821
1776	chr6_qbl_hap2+183	chr6_qbl_hap2	8	AK095821
1777	chr6_qbl_hap2+221	chr6_qbl_hap2	8	BX648392.1
1778	chr7+43	chr7	8	AK129665
1779	chr7+856	chr7	8	AK123961
1780	chr7+5265	chr7	8	AK128326
1781	chr7+6022	chr7	8	AK022149
1782	chr8+3373	chr8	8	AK055415
1783	chr9+185	chr9	8	AK125504
1784	chr9+192	chr9	8	AK126819
1785	chr9+2825	chr9	8	AK095132
1786	chr9+3358	chr9	8	AK022010
1787	chr9+4540	chr9	8	AK127917
1788	chr9+4975	chr9	8	AK021598
1789	chrX+2962	chrX	8	AK094540
1790	chr1-2379	chr1	8	AK026269
1791	chr1-6414	chr1	8	AK022664
1792	chr1-7001	chr1	8	AK125221
1793	chr1-9526	chr1	8	AK093739
1794	chr10-956	chr10	8	AK124846
1795	chr10-5095	chr10	8	AK093978
1796	chr11-956	chr11	8	AK094369
1797	chr11-2010	chr11	8	AK023906
1798	chr11-2974	chr11	8	AK097245
1799	chr11-3236	chr11	8	AK092802
1800	chr12-940	chr12	8	AK056901
1801	chr12-1860	chr12	8	AK126817
1802	chr12-2227	chr12	8	AK055062
1803	chr12-3050	chr12	8	AK093124
1804	chr12-4390	chr12	8	AK090590
1805	chr14-1709	chr14	8	AK097819
1806	chr14-2122	chr14	8	AK097458
1807	chr14-2492	chr14	8	AK022437
1808	chr14-3320	chr14	8	AK056676
1809	chr15-1842	chr15	8	AK021773
1810	chr15-2665	chr15	8	AK092059
1811	chr15-3919	chr15	8	AK094557
1812	chr16-256	chr16	8	AK057367
1813	chr16-725	chr16	8	AK093904
1814	chr16-828	chr16	8	AK125450
1815	chr16-2064	chr16	8	AK093183
1816	chr16-2700	chr16	8	AK097966
1817	chr16-2706	chr16	8	AK027393
1818	chr16-3715	chr16	8	BC001809.2
1819	chr17-1317	chr17	8	AK123839
1820	chr17-1389	chr17	8	AK090983
1821	chr17-1761	chr17	8	AK094941
1822	chr17-3928	chr17	8	AK130829
1823	chr17-4020	chr17	8	AK055873
1824	chr17_random-94	chr17_random	8	AK125669
1825	chr18-1039	chr18	8	AK091642
1826	chr19-1175	chr19	8	AK096984
1827	chr2-22	chr2	8	AK095146
1828	chr2-173	chr2	8	AK056890
1829	chr2-4247	chr2	8	AK091000
1830	chr2-8262	chr2	8	AK055918
1831	chr20-1099	chr20	8	AK094018
1832	chr20-1779	chr20	8	AK123827
1833	chr20-2457	chr20	8	AK123237
1834	chr20-2529	chr20	8	AK093907
1835	chr22-2047	chr22	8	AK057431
1836	chr22-2113	chr22	8	AK021851
1837	chr3-337	chr3	8	AK091192
1838	chr3-631	chr3	8	AK057297
1839	chr3-692	chr3	8	AK022211
1840	chr3-1031	chr3	8	AK124818
1841	chr3-1630	chr3	8	AK097161
1842	chr3-2836	chr3	8	AK124746
1843	chr3-3094	chr3	8	AL137447.1
1844	chr3-3662	chr3	8	AK123099
1845	chr3-4541	chr3	8	AK021708
1846	chr3-5040	chr3	8	AL832835.1
1847	chr3-5743	chr3	8	AK127002
1848	chr3-6397	chr3	8	AK311005
1849	chr3-6495	chr3	8	AK025619
1850	chr4-249	chr4	8	AK056680
1851	chr4-3741	chr4	8	AK001150
1852	chr5-41	chr5	8	AK054653
1853	chr5-4302	chr5	8	AK125084
1854	chr6-2917	chr6	8	AK027193
1855	chr6-6275	chr6	8	BX648115.1
1856	chr7-425	chr7	8	AK055319
1857	chr7-2982	chr7	8	AK310300
1858	chr7-4955	chr7	8	AK024255
1859	chr7-6645	chr7	8	AK094924
1860	chr8-777	chr8	8	AK125310
1861	chr8-2060	chr8	8	AK128161
1862	chr8-3791	chr8	8	AK091697
1863	chr9-1684	chr9	8	AK022033
1864	chr9-1789	chr9	8	AK022164
1865	chr9-3128	chr9	8	AK094356
1866	chr9-3529	chr9	8	AK129495
1867	chr9-4149	chr9	8	AK090398.1
1868	chr1+299	chr1	7	AK130173
1869	chr1+9414	chr1	7	AL080073.1
1870	chr1+9869	chr1	7	AK026836
1871	chr10+3002	chr10	7	AK098511
1872	chr11+3590	chr11	7	BC008359.1
1873	chr11+4650	chr11	7	BX537510.1
1874	chr12+97	chr12	7	AK025052
1875	chr2+3206	chr2	7	BC004960.1
1876	chr20+2593	chr20	7	BC002831.2
1877	chr22+1224	chr22	7	AK097266
1878	chr6+476	chr6	7	AK058074
1879	chr6+1187	chr6	7	AL049336.1
1880	chr7+608	chr7	7	BX538274.1
1881	chr7+5742	chr7	7	AK098800
1882	chr7_random+14	chr7_random	7	AK027667
1883	chr9+3066	chr9	7	AK025151
1884	chrX+3	chrX	7	AL834280.1
1885	chrY+3	chrY	7	AL834280.1
1886	chr11-2108	chr11	7	AL137429.1
1887	chr12-824	chr12	7	AK130690
1888	chr15-1434	chr15	7	AK026340
1889	chr17-3922	chr17	7	AK026312
1890	chr22-1032	chr22	7	BC001801.1
1891	chr3-5934	chr3	7	NM_001008269.1
1892	chr4-3086	chr4	7	AY316301.1
1893	chr4-5073	chr4	7	BC036758.2
1894	chr4-5435	chr4	7	BX648772.1
1895	chr6-4687	chr6	7	AK130398
1896	chr6-4708	chr6	7	AK130438
1897	chr7-798	chr7	7	BC039387.1
1898	chr7-1366	chr7	7	AK129699
1899	chr7-2598	chr7	7	AK074459
1900	chr9-3771	chr9	7	XM_372099.3
1901	chr12+237	chr12	7	AK126216
1902	chr2+2121	chr2	7	AL049443.1
1903	chr3+2894	chr3	7	AK129954
1904	chr7+3340	chr7	7	AK054776
1905	chr20-2254	chr20	7	AK054772
1906	chr5-1096	chr5	7	AK123922
1907	chr1+9122	chr1	7	AK095633
1908	chr1+9138	chr1	7	AK055340
1909	chr1+9874	chr1	7	AK094548
1910	chr1+10086	chr1	7	AK094778
1911	chr10+393	chr10	7	AK094292
1912	chr10+2382	chr10	7	AK055756
1913	chr10+3696	chr10	7	AK094279
1914	chr10+5195	chr10	7	AL713636.1
1915	chr10+5426	chr10	7	AK124226
1916	chr11+4576	chr11	7	AK126422
1917	chr11+4646	chr11	7	AK124988
1918	chr12+915	chr12	7	AK125676
1919	chr12+1719	chr12	7	AK023299
1920	chr12+3210	chr12	7	AK125933
1921	chr12+5004	chr12	7	AK308987
1922	chr12+5472	chr12	7	AK093493
1923	chr12+5660	chr12	7	AK094824
1924	chr13+1203	chr13	7	AK023477
1925	chr13+1494	chr13	7	AK091931
1926	chr13+1502	chr13	7	AK054833
1927	chr13+2740	chr13	7	AK093862
1928	chr14+357	chr14	7	AK097507
1929	chr14+1676	chr14	7	AK093749
1930	chr14+2126	chr14	7	AK096988
1931	chr15+78	chr15	7	AK094265
1932	chr15+387	chr15	7	AK094557
1933	chr15+1457	chr15	7	AK124842
1934	chr16+2355	chr16	7	AK094311
1935	chr16+3680	chr16	7	AK022464
1936	chr16+3821	chr16	7	AK024389
1937	chr17+2464	chr17	7	AK123035
1938	chr17+4971	chr17	7	AK055832
1939	chr18+161	chr18	7	AK098180
1940	chr18+1984	chr18	7	AK054836
1941	chr18+2523	chr18	7	AK097695
1942	chr19+2083	chr19	7	AK290763
1943	chr19+2780	chr19	7	AK098812
1944	chr1_random+55	chr1_random	7	AK091693
1945	chr2+4075	chr2	7	AK056640
1946	chr2+5156	chr2	7	AK091798
1947	chr2+5356	chr2	7	AK124972
1948	chr2+5622	chr2	7	AK022429
1949	chr2+6975	chr2	7	AK002088
1950	chr2+7306	chr2	7	AK130181
1951	chr2+8278	chr2	7	AK023296
1952	chr20+455	chr20	7	AK126221
1953	chr20+511	chr20	7	AK094472
1954	chr22+1283	chr22	7	AK123632
1955	chr3+1350	chr3	7	AK125415
1956	chr3+1846	chr3	7	AK024375
1957	chr3+3127	chr3	7	AK126425
1958	chr3+3292	chr3	7	AK128475
1959	chr3+3307	chr3	7	AK055831
1960	chr3+4182	chr3	7	AK098102
1961	chr3+5097	chr3	7	AK123339
1962	chr3+5768	chr3	7	AK098763
1963	chr3+6036	chr3	7	AK090977
1964	chr3+6608	chr3	7	AK022461
1965	chr3+6808	chr3	7	AK021754
1966	chr3+7409	chr3	7	AK023352
1967	chr3+7668	chr3	7	AK126698
1968	chr4+3341	chr4	7	AK123926
1969	chr5+156	chr5	7	AK022063
1970	chr5+1540	chr5	7	AK055666
1971	chr5+4316	chr5	7	AK057639
1972	chr5+6301	chr5	7	AK093197
1973	chr6+1868	chr6	7	AK025534
1974	chr6+6122	chr6	7	AK023059
1975	chr6+6304	chr6	7	AK023829
1976	chr7+19	chr7	7	AK126475
1977	chr7+2302	chr7	7	AK097702
1978	chr7+5272	chr7	7	AK022109
1979	chr7+5684	chr7	7	AK094915
1980	chr8+1247	chr8	7	AK096237
1981	chr8+1710	chr8	7	AK057134
1982	chr9+6	chr9	7	BC048429.1
1983	chr9+1248	chr9	7	AK096814
1984	chr9+2995	chr9	7	AK095188
1985	chr9+3124	chr9	7	AK094719
1986	chr9+5209	chr9	7	AK302968
1987	chrX+1603	chrX	7	AK093553
1988	chrY+170	chrY	7	AF000991.1
1989	chr1-1031	chr1	7	AK095901
1990	chr1-1689	chr1	7	AK127526
1991	chr1-3251	chr1	7	AK093612
1992	chr1-3863	chr1	7	AK024206
1993	chr1-8629	chr1	7	AK095731
1994	chr1-8892	chr1	7	AK095431
1995	chr10-453	chr10	7	AK123463
1996	chr10-4362	chr10	7	AK057722
1997	chr10-5109	chr10	7	AK021524
1998	chr10-5527	chr10	7	AK097474
[truncated: 1,182 more rows]
