# Supplementary material for: Identification and Characterization of Novel Genotoxic Stress-Inducible Nuclear Long Noncoding RNAs in Mammalian Cells
Source: PLoS One. 2012 Apr 19;7(4):e34949. doi: 10.1371/journal.pone.0034949 (PMC3330809; doi:10.1371/journal.pone.0034949)
Supplement: Table S3 — Determination of NMD-target genes. This table lists relative RNA level of long ncRNA candidates in UPF1 knock down cells and control cells. (XLS) [file pone.0034949.s007.xls]

## Sheet: Table S3
Table S3. Determination of NMD-target genes
Code name	Relative RNA level (%)
UHG	2.57577
Gas5	4.04181
UT3	0.87
UT4	0.704661
UT5	1.50004
UT6	0.719466
UT7	0.628506
UT8	16.2234
UT9	0.630689
UT10	1
UT11	5.29636
UT12	0.982821
UT13	1.6358
UT14	0.655196
UT16	0.965937
UT17	0.556711
UT18	1.23971
UT19	0.969291
UT20	0.829319
UT21	1.45397
UT22	0.776469
UT23	2.09217
UT24	0.864538
UT26	1.16473
UT27	2.62989
UT28	2.82843
UT29	2.91805
UT30	0.784585
UT32	0.607097
UT35	0.876605
UT37	2.0209
UT38	0.709562
UT39	0.959264
UT40	1.38992
UT41	0.787307
UT43	0.823591
UT45	0.719466
UT46	1.03886
