# Supplementary material for: Identification and Characterization of Novel Genotoxic Stress-Inducible Nuclear Long Noncoding RNAs in Mammalian Cells
Source: PLoS One. 2012 Apr 19;7(4):e34949. doi: 10.1371/journal.pone.0034949 (PMC3330809; doi:10.1371/journal.pone.0034949)
Supplement: Table S4 — The nuclear/cytoplasmic (N/C) ratio of long ncRNA candidates. This table lists nuclear/cytoplasmic (N/C) ratio of ncRNA candidates. (XLS) [file pone.0034949.s008.xls]

## Sheet: Table S4
Table S4. The nuclear/cytoplasmic (N/C) ratio of long ncRNA candidates
Code name	The N/C ratio
UT3	3.6
UT4	2.3
UT5	9.8
UT6	4
UT7	2.8
UT9	4.3
UT10	5
UT12	10.9
UT13	0.7
UT14	8.1
UT16	5.9
UT17	5.8
UT18	4
UT19	3.5
UT20	2.4
UT21	2.1
UT22	5.2
UT24	4.7
UT26	26.5
UT30	21.3
UT32	20.2
UT36	14.8
UT38	0.7
UT39	4.3
UT40	1.3
UT41	1.1
UT43	4.8
UT45	2.9
UT46	10.1
